# Supplementary material for: Low temperature thermal RAFT depolymerization: the effect of Z-group substituents on molecular weight control and yield
Source: Royal Society of Chemistry journal article supplement (doi:10.1039/d4sc07518h), 2025-01-01
Supplement: d4sc07518h1.pdf [file d4sc07518h1.pdf]

**Low Temperature Thermal RAFT Depolymerization; the Effect of Z-group Substituents  
on Molecular Weight Control and Yield**

Nethmi De Alwis Watuthanthrige<sup>a</sup>, Anastasiia Moskalenko<sup>a</sup>, Asja A. Kroeger<sup>b</sup>, Michelle L.  
Coote<sup>b</sup>, Nghia Truong<sup>a</sup>, Athina Anastasaki<sup>\*a</sup>

<sup>a</sup> Laboratory of Polymeric Materials, Department of Materials, ETH Zurich, Vladimir-Prelog-Weg  
5, Zurich 8093, Switzerland

<sup>b</sup> Institute for Nanoscale Science and Technology, College of Science and Engineering, Flinders  
University, Bedford Park, South Australia 5042, Australia

## Contents

|                                                                                                                                    |    |
|------------------------------------------------------------------------------------------------------------------------------------|----|
| <b>1. Methods</b> .....                                                                                                            | 4  |
| <b>1.1. Materials</b> .....                                                                                                        | 4  |
| <b>1.2. NMR spectroscopy</b> .....                                                                                                 | 4  |
| <b>1.3. Size-exclusion chromatography (SEC)</b> .....                                                                              | 4  |
| <b>1.4 Mass Spectrometry (MS)</b> .....                                                                                            | 4  |
| <b>1.5. Synthesis of CTAs</b> .....                                                                                                | 4  |
| <b>1.5.1. 2-cyanopropan-2-yl 4-methoxybenzodithioate (<i>p</i>-OMe CTA)</b> .....                                                  | 4  |
| <b>1.5.2. 2-cyanopropan-2-yl 4-(tert-butoxy)benzodithioate (<i>p</i>-OtBu CTA)</b> .....                                           | 5  |
| <b>1.5.3. 2-cyanopropan-2-yl 3,5-bis(trifluoromethyl)benzodithioate (bis-<i>m</i>-CF<sub>3</sub> CTA)</b> .....                    | 5  |
| <b>1.5.4. 2-cyanopropan-2-yl 4-(trifluoromethoxy)benzodithioate (<i>p</i>-OCF<sub>3</sub>)</b> .....                               | 6  |
| <b>1.6. Synthesis of PMMA</b> .....                                                                                                | 6  |
| <b>1.6.1. typical Polymerization procedure of MMA using 2-cyanopropan-2-yl benzodithioate (<i>p</i>-H) as the RAFT agent</b> ..... | 6  |
| <b>1.7 Chain Transfer Coefficients (C<sub>tr</sub>) Calculation</b> .....                                                          | 7  |
| <b>1.8. Depolymerization of PMMA</b> .....                                                                                         | 8  |
| <b>1.8.1. Typical Depolymerization procedure of PMMA with 5mM solution</b> .....                                                   | 8  |
| <b>1.9. Constructing Hammet Plot</b> .....                                                                                         | 8  |
| <b>2. Supporting Data</b> .....                                                                                                    | 10 |
| <b>3. Total energies</b> .....                                                                                                     | 18 |
| <b>3.1. Overall fragmentation processes</b> .....                                                                                  | 18 |
| <b>4. Cartesian coordinates</b> .....                                                                                              | 20 |
| <b>4.1 Structures used to evaluated addition-fragmentation reactions</b> .....                                                     | 21 |
| <b>5. References</b> .....                                                                                                         | 33 |

## **1. Methods**

### **1.1. Materials.**

All materials were purchased from either Sigma Aldrich or Fischer Scientific unless otherwise stated. Monomers were filtered through basic alumina before use.

### **1.2. NMR spectroscopy.**

<sup>1</sup>H-NMR spectra were recorded on a Bruker Avance-300 spectrometer using CDCl<sub>3</sub> as the NMR solvent.

### **1.3. Size-exclusion chromatography (SEC).**

SEC was measured on a Shimadzu equipment comprising a CBM-20A system controller, LC-20AD pump, SIL-20A automatic injector, 10.0 μm bead-size guard column (50 x 7.5 mm) followed by three KF-805L columns (300 x 8 mm, bead size: 10 μm, pore size maximum: 5000 Å), SPD-20A ultraviolet (UV) detector, and an RID-20A differential refractive index (RI) detector. For the UV measurements, 310 nm wavelength was selected. The column temperature was maintained at 40 °C using a CTO-20A oven. The flow rate was set to 1 ml/min and with N, N-dimethylacetamide (DMAc, Acros, HPLC grade, with 0.03 w/v LiBr) as the eluent. Molecular weights were determined relative poly(methyl methacrylate) standards with molecular weights ranging from 5,000 to 1.5 x 10<sup>6</sup> g/mol (Agilent Technologies). All SEC samples were dissolved in DMAc and passed through 0.45 μm filters prior to analysis.

### **1.4 Mass Spectrometry (MS)**

Mass spectrometry (MS) experiments were either performed on a Bruker Maxis I quadrupole-time-of-flight (QTOF) at 4500V emitter voltage with electrospray ionization (ESI) as ion source and direct injection or on a Thermo Scientific QExactive GC Orbitrap (GC-MS) with Ion-Trap (OrbiTrap) and electron impact (EI) as ion source.

### **1.5. Synthesis of CTAs**

#### **1.5.1. 2-cyanopropan-2-yl 4-methoxybenzodithioate (*p*-OMe CTA)**

The synthesis procedure was adopted from existing literature.<sup>1</sup>

A mixture of Mg (0.25 g) in dry THF (40 mL), along with a pinch of iodine, was deoxygenated for 20 minutes in a 150 mL two neck round bottom flask equipped with a condenser and a magnetic stirrer bar. A solution of 4-bromoanisole (1.25 mL, 10 mmol) in 10 mL of dry THF was added to

the deoxygenated system while purging it with nitrogen. The reaction mixture was heated gently to initiate the reaction and stirred for 3 h. After 3 hours, carbon disulfide (1 mL, 16.7 mmol) was added dropwise to the solution and stirred for a further 3 hrs. Excess solvent was removed under vacuum, and the resulting deep red viscous liquid was dissolved in 0.1 M K<sub>2</sub>CO<sub>3</sub> solution (100 mL). The dissolved red color solvent was then filtered and washed with ethyl ether (2 x 50 mL) to remove unreacted materials and dissolved I<sub>2</sub>, and poured into a flask equipped with a magnetic stirrer. An aqueous solution of 1 N iodine (2 g of KI and 1.27 g of I<sub>2</sub> crystals in 10 mL of distilled water) was added to the reaction mixture until the solution started to change color from dark red to pink as the formed disulfide precipitated. To quench the excess I<sub>2</sub>, a few crystals of Na<sub>2</sub>S<sub>2</sub>O<sub>3</sub> were added. The resultant aqueous solution was extracted with methylene chloride and dried over anhydrous sodium sulfate. The excess solvent was evaporated under vacuum to obtain the disulfide bridge compound as a red solid.

The resultant bridge compound (0.65 g, 1.8 mmol) and AIBN (0.34 g, 2.1 mmol) were dissolved in 120 mL of ethyl acetate in a 250 mL two neck round bottom flask equipped with a condenser and a magnetic stirrer. The solution was degassed for 20 minutes and refluxed (100 °C) under nitrogen atmosphere for 24 hrs. The reaction was monitored with TLC and once all the bridge compounds converted to product the reaction was stopped, and the excess solvent was removed under vacuum. The crude product was purified by a flash chromatography (hexane/ethyl ether=7:3) obtaining reddish pink color crystalline solid (yield 86%, purity 99.3%). <sup>1</sup>H NMR (300 MHz, CDCl<sub>3</sub>) δ 7.93 (d, *J* = 9.0 Hz, 2H), 6.81 (d, *J* = 9.0 Hz, 2H), 3.80 (s, 3H), 1.87 (s, 6H).

### **1.5.2. 2-cyanopropan-2-yl 4-(tert-butoxy)benzodithioate (*p*-OtBu CTA)**

The synthesis of novel *p*-OtBu CTA was conducted following the established procedure for *p*-OMe CTA. The reaction used 1-bromo-4-(tert-butoxy)benzene as the starting material, in equimolar quantities. The product obtained was a reddish-pink crystalline solid with an 80% yield (99.3% purity). <sup>1</sup>H NMR (300 MHz, CDCl<sub>3</sub>) δ 7.86 (d, *J* = 8.8 Hz, 2H), 6.89 (d, *J* = 8.9 Hz, 2H), 1.87 (s, 6H), 1.35 (s, 12H), <sup>13</sup>C NMR (126 MHz, CDCl<sub>3</sub>) δ 220.98, 161.03, 138.99, 128.04, 122.02, 120.24, 79.94, 41.58, 28.95, 26.66, *m/z* = 293.0903.

### **1.5.3. 2-cyanopropan-2-yl 3,5-bis(trifluoromethyl)benzodithioate (bis-*m*-CF<sub>3</sub> CTA)**

The synthesis was carried out using a published procedure in literature.<sup>2</sup>

A 25% solution of sodium methoxide in methanol (4.57 mL, 20mmol) was added to a suspension of sulfur (0.64 g, 20 mmol) and 3,5-bis(trifluoromethyl)benzyl bromide (1.83 mL, 10 mmol) in methanol (50mL) in a round-bottom flask equipped with a condenser and magnetic stirring. After 3 hrs, the solvent was removed and then resulting dark brown crude product was dissolved in a diluted solution of NaHCO<sub>3</sub>. After being washed with ethyl ether (2× 50 mL), an aqueous solution of iodine 0.96 N (10.42 mL, 10 mmol) was added dropwise. During the addition, the solution started to change color from dark brown to pink as the disulfide precipitated. After elimination of excess I<sub>2</sub> with few crystals of Na<sub>2</sub>S<sub>2</sub>O<sub>3</sub>, the mixture was extracted with ethyl ether and dried over sodium sulfate. After removal of the solvent, the crude product (0.87 g) was not purified because of its instability toward cleaning procedures and was directly used for the subsequent reaction.

The reaction with AIBN and bridge compound was carried out using same procedure as described in synthesis of Cyanopropyl-2-yl(4-methoxy) Dithiobenzoate (*p*-OMe CTA) using crude disulfide bridged compound (0.87 g, 1.2 mmol) and AIBN (0.81 g, 1.9 mmol) after a flash chromatography (hexane/ethyl ether=7:3) as a reddish pink color crystalline solid (yield 58%, purity 99.3%). <sup>1</sup>H NMR (300 MHz, CDCl<sub>3</sub>) δ 8.23 (s, 2H), 7.98 (s, 1H), 1.90 (s, 6H).

#### 1.5.4. 2-cyanopropan-2-yl 4-(trifluoromethoxy)benzodithioate (*p*-OCF<sub>3</sub>)

The synthesis of *p*-OCF<sub>3</sub> CTA was conducted following the established procedure for *p*-OCF<sub>3</sub> CTA.<sup>1</sup> The reaction used 1-bromo-4-(trifluoromethoxy)benzene as the starting material in equimolar quantities, as reported in the literature. The product obtained was a reddish-pink crystalline solid with a 65% yield (98.5% purity). <sup>1</sup>H NMR (300 MHz, CDCl<sub>3</sub>) δ 7.90 (d, *J* = 8.9 Hz, 1H), 7.16 (d, *J* = 8.4 Hz, 2H), 1.88 (s, 4H).

### 1.6. Synthesis of PMMA

#### 1.6.1. typical Polymerization procedure of MMA using 2-cyanopropan-2-yl benzodithioate (*p*-H) as the RAFT agent.

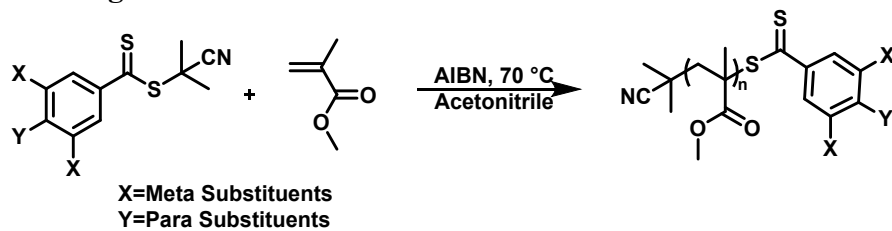

A typical polymerization procedure targeting a DP of 75 is described here with *p*-H CTA and methyl methacrylate (MMA). In a 25 mL round-bottom flask, 63.2 mg of 2-cyanopropan-2-yl benzodithioate (285.4  $\mu\text{mol}$ , 1 equiv) and 4.68 mg of AIBN (28.5  $\mu\text{mol}$ , 0.1 equiv) were dissolved in 4 mL of acetonitrile. Then, 4 mL of MMA (39.9 mmol, 140 equiv) and a magnetic stir bar were added. The flask was sealed with a septum and deoxygenated by bubbling nitrogen gas for 15 minutes.

Polymerization was conducted in an oil bath at 70 °C with stirring at 400 rpm. Periodic samples were collected under a nitrogen blanket for  $^1\text{H-NMR}$  analysis and were filtered through a 0.45  $\mu\text{m}$  PTFE syringe filter before SEC analysis. The polymerization was terminated at 40% monomer conversion by removing the flask from the oil bath and unsealing the septum.

The same protocol was applied for PMMA synthesis using other RAFT agents, adjusting the amounts of CTA based on their molecular weights.

### 1.7 Chain Transfer Coefficients ( $C_{tr}$ ) Calculation

$C_{tr}$  was calculated using a modified version of the method developed by Moad, Rizzardo, and Thang.<sup>3</sup>

Into a 25 mL round bottom flask, 63.2 mg of 2-cyanopropan-2-yl benzodithioate (285.4  $\mu\text{mol}$ , 1 equiv) and 4.68 mg AIBN (28.5  $\mu\text{mol}$ , 0.1 equiv) were dissolved in 4 mL acetonitrile. Subsequently, 4 mL of MMA (39.9 mmol, 140 equiv) and a stirrer bar were added, and the flask was sealed with a septum, prior to deoxygenation by nitrogen bubbling for 15 min. Polymerization was conducted in an oil bath at 70 °C with a 400-rpm stirring rate. 0.1 mL samples were taken periodically under a nitrogen blanket for  $^1\text{H-NMR}$  and SEC analysis. For SEC samples, 50  $\mu\text{L}$  samples were diluted with 1.5 mL DMAc and passed through a syringe filter (0.45  $\mu\text{m}$  PTFE membrane).

The conversion of the monomer was calculated through NMR by integrating the vinyl peaks with respect to methoxy peak (polymer + monomer) around 3.5 ppm. The conversion of the RAFT agent was calculated by the intensity of the RAFT agent UV signal in SEC, and the apparent  $C_{tr}$  was

calculated by the equation  $C_{tr} = \frac{d(\ln [RAFT\ agent])}{d(\ln [MMA])}$ . Thus the slope of a  $\ln[RAFT\ agent]$  vs  $\ln[MMA]$  plot is the apparent  $C_{tr}$ .

## 1.8. Depolymerization of PMMA

### 1.8.1. Typical Depolymerization procedure of PMMA with 5mM solution

In a 250 mL Schlenk flask, 20 mg of PMMA was dissolved in 40 mL of 1,4-dioxane. To this, 15 mg of poly(ethylene glycol) monomethyl ether (molar mass 350 g/mol) was added as an internal standard for  $^1\text{H}$  NMR analysis. The flask was then sealed with a rubber septum and deoxygenated by bubbling nitrogen gas for 20 minutes.

The flask was placed in an oil bath preheated to one of the target temperatures (70 °C, 80 °C, 90 °C, 100 °C, or 120 °C) to initiate the reaction. It was submerged that the solution inside was approximately 2 cm below the surface of the oil bath.

To take samples, the flask was periodically removed from the oil bath and quickly cooled in a water bath to room temperature. Samples were then collected under a nitrogen blanket. For SEC analysis, approximately 3 mL of the sample solution was evaporated, dissolved in 1.5 mL of DMAc, and filtered through a 0.45  $\mu\text{m}$  PTFE syringe filter.

## 1.9. Constructing Hammet Plot

The UV signal loss during each depolymerization was calculated using Equation S1 and subsequently plotted against depolymerization time to track the kinetics. The rate constant for UV signal loss,  $k_{\text{uv-loss}}$ , was determined from these kinetic plots. To facilitate comparisons, the UV loss rates of other polymers were normalized to that of the unsubstituted CTA-containing polymer. These normalized rates were then plotted against the Hammett substituent constant for each substituent group (Equation S2). The slope of this plot, denoted as the reaction rate constant  $\rho$ , is influenced by the substituent effect and depends on both the type and position of each substituent within the molecule. The constant  $\rho$  is specific to the reaction and is also affected by conditions such as temperature and solvent. (Typical values for  $\rho$  in common reactions range from about  $-1$  to  $+1$ )

1. Larger  $\rho$  values (whether +ve or -ve): reaction is more sensitive to substituent effects, indicating that the electronic nature of the substituent has a stronger influence on the reaction rate
2. Smaller  $\rho$  values : reduced sensitivity, indicating that the substituent effect is weaker in the reaction mechanism.

3. +ve  $\rho$  value: the reaction rate increases with electron-withdrawing substituents and reaction mechanism involves a buildup of negative charge on the transition state or intermediate, which is stabilized by electron-withdrawing groups.
4. -ve  $\rho$  value: the reaction rate increases with electron-donating substituents and buildup of positive charge or electrophilic state in the transition state or intermediate, which is stabilized by electron-donating groups.
5.  $\rho=0$ , no sensitivity to substituents, and no charge is built or lost.

These relations can be developed to elucidate the mechanism of a reaction. As the value of  $\rho$  is related to the charge during the rate determining step, mechanisms can be devised based on this information.

$$UV\ Loss = \frac{(UV_{polymer,0} - UV_{polymer,t})}{UV_{polymer,0}} \quad \text{Equation S 1}$$

Where  $UV_{polymer,0}$  is the UV signal of the polymer at time 0,  $UV_{polymer,t}$  is the UV signal of the polymer at time t.

$$\frac{\log k_x}{\log k_H} = \sigma \rho \quad \text{Equation S 2}$$

Where  $k_x$  is the rate of UV-loss in polymers with substituent x,  $k_H$  is the rate of UV-loss in polymers with substituent H,  $\sigma$  is the Hammett substituent constant (available in literature),<sup>4,5</sup> and  $\rho$  is the overall reaction rate constant.

### 1.10 Computational Methods

Geometry optimizations and frequency calculations were performed at the SMD<sup>6</sup>-(1,4-dioxane)-M062X<sup>7</sup>/6-31G(d)<sup>8-11</sup> level of theory. For evaluation of the addition-fragmentation equilibria, thorough conformational searches (i.e., with resolutions of 120° around sp<sup>3</sup>-sp<sup>3</sup> bonds and 180° around sp<sup>2</sup>-sp<sup>3</sup> bonds) were carried out to obtain the global minimum conformation of each structure of interest. For calculations of the descriptors, equivalent conformers of reference compounds were used as recommended in ref. <sup>12</sup> In all cases, more accurate electronic energies were subsequently calculated at the SMD<sup>6</sup>-(1,4-dioxane)-wB97X-D<sup>13</sup>/aug-cc-pVTZ<sup>14, 15</sup> level of



theory. Solution phase Gibbs free energies were calculated via the “direct method” of Truhlar and co-workers,<sup>16</sup> in which ideal gas partition functions, evaluated here under the harmonic oscillator / rigid rotor approximation, were applied directly to the solution-phase geometries and frequencies. A correction for the change of state from 1 atm to 1 M was included.<sup>17</sup> All geometry optimizations, frequency, and single point energy calculations were carried out using the Gaussian16 program package.<sup>18</sup> 3D visualizations were generated with CYLview.<sup>19</sup>

## 2. Supporting Data

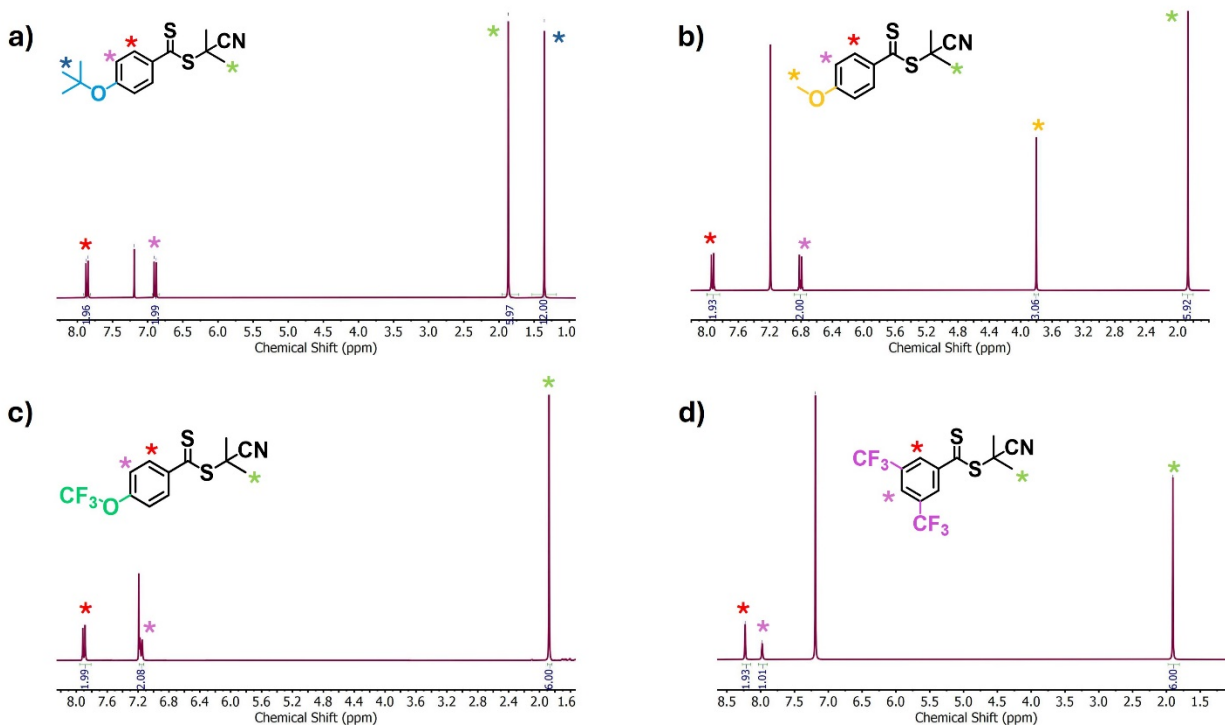

**Figure S 1:** <sup>1</sup>H NMR spectra of the synthesized CTAs a) *p*-OtBu, b) *p*-OMe, c) *p*-OCF<sub>3</sub>, d) *bis-m*-CF<sub>3</sub>

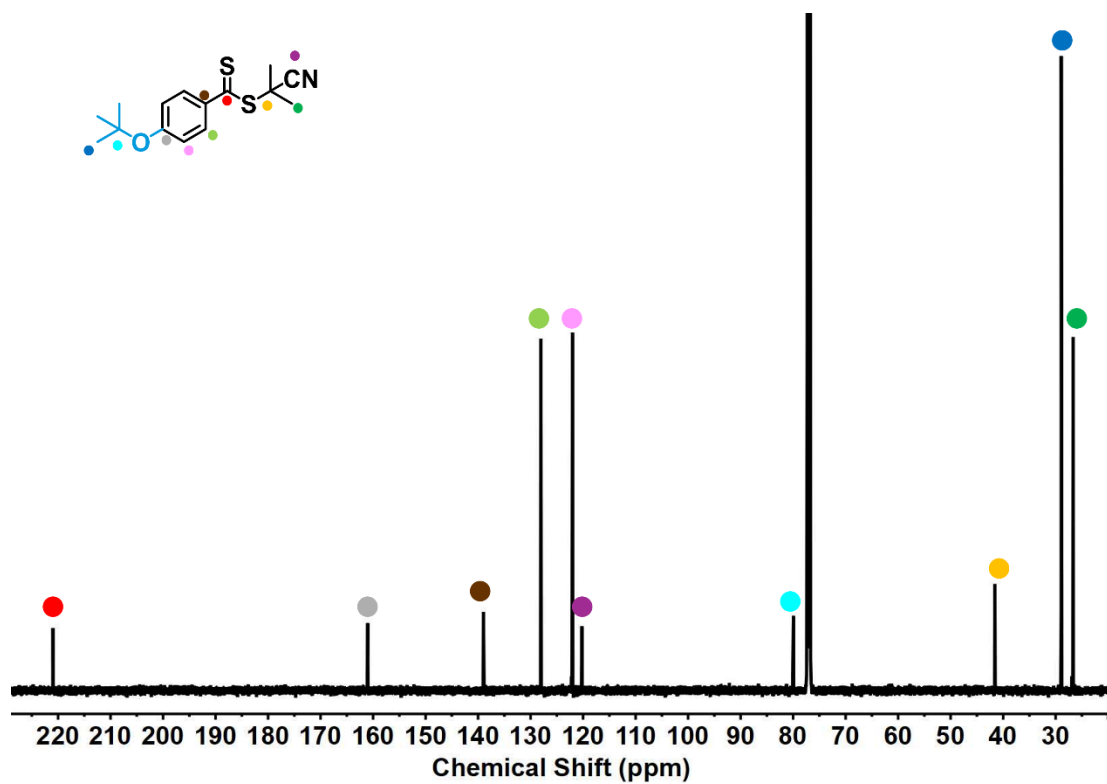

Figure S 2:  $^{13}\text{C}$  NMR spectrum of the novel *p*-OtBu CTA

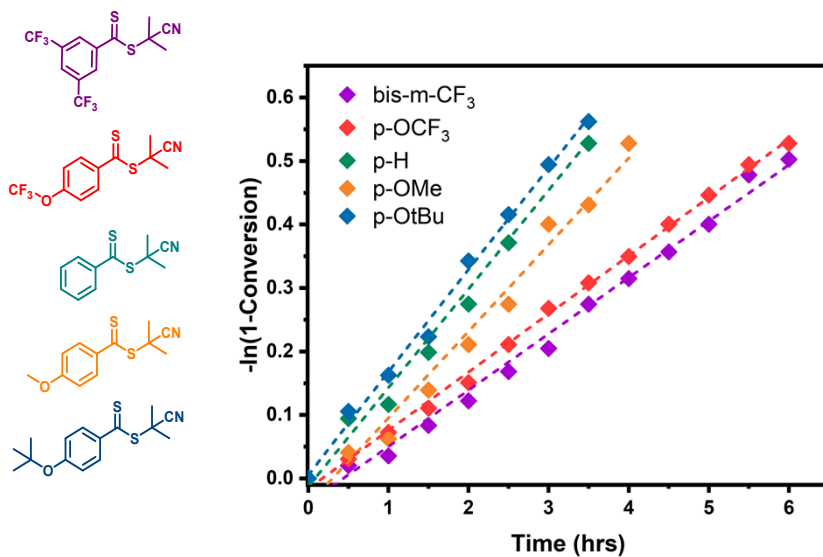

**Figure S 3:** Polymerization Kinetics; semi-logarithmic plots for the polymerization of methyl methacrylate at 70 °C. AIBN: DTB-X:MMA=0.1:1:140 (X=*p*-OtBu, *p*-OMe, *p*-H, *p*-OCF<sub>3</sub>, bis-*m*-CF<sub>3</sub>)

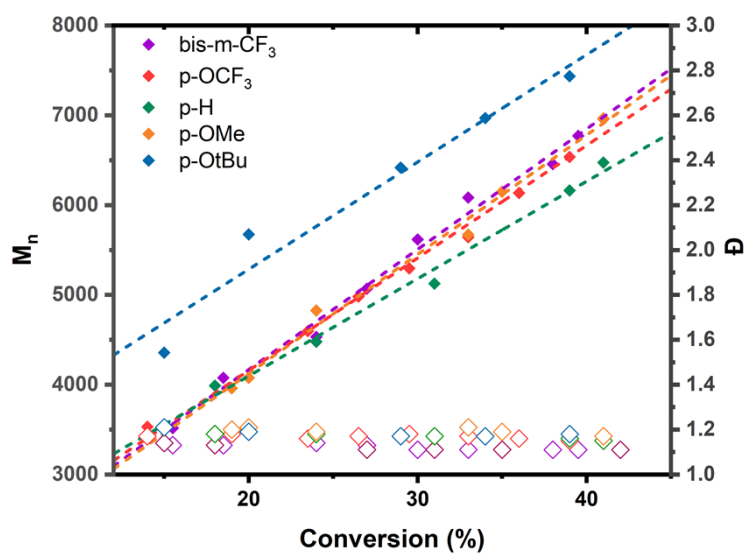

**Figure S 4:**  $M_n$  and  $\bar{D}$  evolution for the polymerization of methyl methacrylate at 70 °C. AIBN: DTB-X:MMA=0.1:1:140 (X=*p*-OtBu, *p*-OMe, *p*-H, *p*-OCF<sub>3</sub>, bis-*m*-CF<sub>3</sub>)

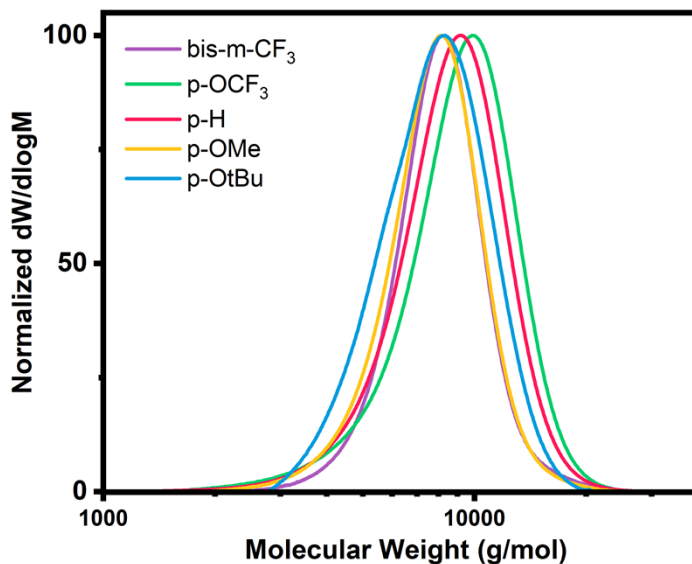

**Figure S 5:** SEC traces of DP75 PMMA polymers with bis-*m*-CF<sub>3</sub>, *p*-OCF<sub>3</sub>, *p*-H, *p*-OMe, *p*-OtBu Z-groups

**Table S 1:**  $M_{n(exp)}$ , Dispersity ( $\mathfrak{D}$ ) values obtained through SEC traces, Calculated livingness of the polymers with DTB-bis-*m*-CF<sub>3</sub>, DTB-*p*-OCF<sub>3</sub>, DTB-*p*-H, DTB-*p*-OMe, DTB-*p*-OtBu Z-groups

| Polymer                                            | $M_n$ | $\mathfrak{D}$ | Livingness (%) <sup>a</sup> |
|----------------------------------------------------|-------|----------------|-----------------------------|
| Bis- <i>m</i> -CF <sub>3</sub> -PMMA <sub>75</sub> | 7200  | 1.11           | 97.6                        |
| <i>p</i> -OCF <sub>3</sub> -PMMA <sub>75</sub>     | 7300  | 1.11           | 97.6                        |
| <i>p</i> -H-PMMA <sub>75</sub>                     | 7500  | 1.15           | 98.3                        |
| <i>p</i> -OMe-PMMA <sub>75</sub>                   | 7300  | 1.17           | 98.2                        |
| <i>p</i> -OtBu-PMMA <sub>75</sub>                  | 7500  | 1.18           | 98.3                        |

$$L = \frac{[CTA]_0}{[CTA]_0 + 2f[I]_0(1 - e^{-k_d t})(1 - \frac{f_c}{2})} \text{ equation}^{20}$$

<sup>a</sup> livingness was calculated using

where  $[CTA]_0$  and  $[I]_0$  are the initial concentrations of chain transfer agent and initiator, respectively. The term “2” means that one molecule of initiator gives two primary radicals with a certain efficiency  $f$  (typically 0.5 for diazo initiators). The term  $1 - f_c/2$  represents the number of chains produced in a radical–radical termination event with  $f_c$  the coupling factor ( $f_c = 1$  means 100% bimolecular termination by combination;  $f_c = 0$  means 100% bimolecular termination by disproportionation).

**Table S 2:** Depolymerization conversions at different temperatures for PMMA DP 75 polymers with different substituents ranging from 120 °C to 70 °C

| Substituent                    | Depolymerization Conversion (%) <sup>a</sup> |        |        |       |       |       |
|--------------------------------|----------------------------------------------|--------|--------|-------|-------|-------|
|                                | 120 °C                                       | 110 °C | 100 °C | 90 °C | 80 °C | 70 °C |
| <i>p</i> -OtBu                 | 79                                           | 82     | 81     | 75    | 45    | 16    |
| <i>p</i> -OMe                  | 79                                           | 81     | 75     | 62    | 35    | 12    |
| <i>p</i> -H                    | 85                                           | 86     | 62     | 35    | 13    | 1     |
| <i>p</i> -OCF <sub>3</sub>     | 87                                           | 87     | 55     | 28    | 8     | 2     |
| Bis- <i>m</i> -CF <sub>3</sub> | 85                                           | 85     | 50     | 18    | 2     | 0     |

<sup>a</sup> the depolymerization conversions were calculated using the average of at least 3 experimental measurements.

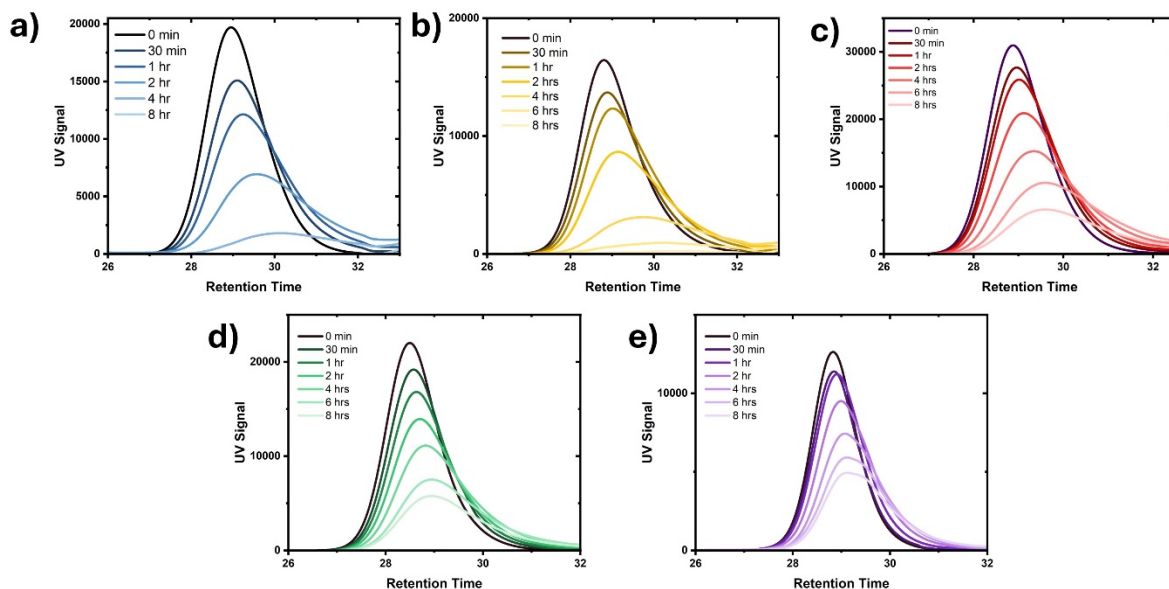

**Figure S 6:** UV signal variations in the SEC UV detector during the kinetic experiments for polymers with different substituents at 90 °C, a) *p*-OtBu, b) *p*-OMe, c) *p*-H, d) *p*-OCF<sub>3</sub> and e) *bis-m*-CF<sub>3</sub>

**Table S 3:** UV loss (%) and depolymerization conversions (%) at 90 °C for polymers with different substituents (conditions: 5mM repeating unit concentration, in Dioxane)

| Time (mins) | <i>p</i> -OtBu |           | <i>p</i> -OMe |           | <i>p</i> -H |           | <i>p</i> -OCF <sub>3</sub> |           | Bis- <i>m</i> -CF <sub>3</sub> |           |
|-------------|----------------|-----------|---------------|-----------|-------------|-----------|----------------------------|-----------|--------------------------------|-----------|
|             | UV Loss (%)    | Depol (%) | UV Loss (%)   | Depol (%) | UV Loss (%) | Depol (%) | UV Loss (%)                | Depol (%) | UV Loss (%)                    | Depol (%) |
| 0           | 0              | 0         | 0             | 0         | 0           | 0         | 0                          | 0         | 0                              | 0         |
| 30          | 12             | 16        | 9             | 10        | 4           | 5         | 6                          | 8         | 4                              | 2         |
| 60          | 20             | 28        | 10            | 18        | 7           | 9         | 9                          | 11        | 10                             | 3         |
| 120         | 43             | 49        | 28            | 36        | 18          | 19        | 16                         | 18        | 12                             | 8         |
| 240         | 84             | 71        | 66            | 58        | 42          | 26        | 31                         | 22        | 26                             | 11        |
| 360         | 97             | 74        | 89            | 66        | 72          | 29        | 61                         | 24        | 35                             | 15        |
| 480         | 99             | 75        | 99            | 68        | 84          | 33        | 78                         | 25        | 44                             | 17        |

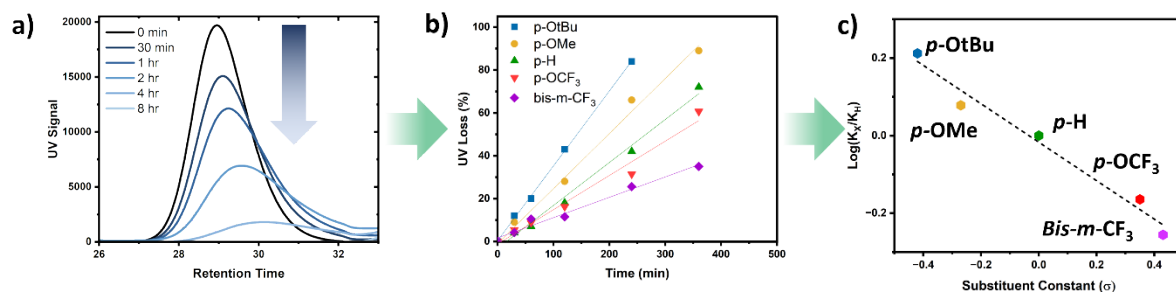

Figure S 7: Steps for constructing Hammett plots: (a) Performing SEC-UV analysis and calculate the percentage of UV loss using Equation S1; (b) determining the UV-loss rate for each polymer with different substituents; (c) normalize the rates relative to the UV-loss rate of the non-substituted polymer and construct the Hammett plot by plotting the normalized logarithmic rate ( $\log(k_x/k_H)$ ) against the substituent constants ( $\sigma$ ).

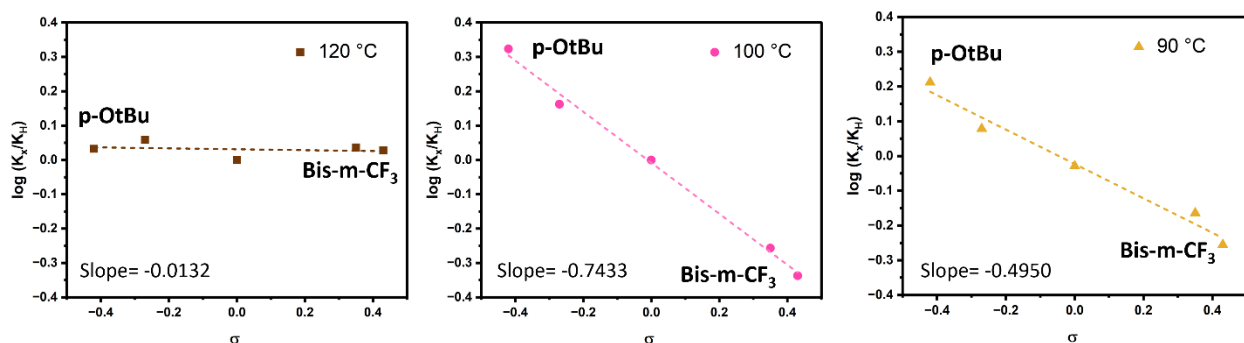

**Figure S 8:** Variations in Hammett plots a) at 120 °C, b) at 100 °C, and c) at 90°C

**Table S 4:** Depolymerization conversions (%) and  $M_n$  Shift (%) values at 100 °C for *p*-OtBu and bis-*m*-CF<sub>3</sub> containing polymers (conditions: 2.5 mM repeating unit concentration, in Dioxane)

| Time | <i>p</i> -OtBu |                  | Bis- <i>m</i> -CF <sub>3</sub> |                  |
|------|----------------|------------------|--------------------------------|------------------|
|      | Depol (%)      | $M_n$ Shift (%)* | Depol (%)                      | $M_n$ Shift (%)* |
| 0    | 0              | 0                | 0                              | 0                |
| 30   | 17             | 3.8              | 13                             | 7.5              |
| 60   | 33             | 9.6              | 23                             | 15.5             |
| 120  | 59             | 14               | 44                             | 26               |
| 240  | 75             | 14               | 62                             | 31               |
| 360  | 79             | 14               | 68                             | 34               |

\*  $M_n$  Shift =  $\frac{(M_{n,0} - M_{n,t})}{M_{n,0}} \times 100\%$  where  $M_{n,0}$  is the  $M_n$  of the polymer at time 0, and  $M_{n,t}$  is the  $M_n$  of the polymer at time t

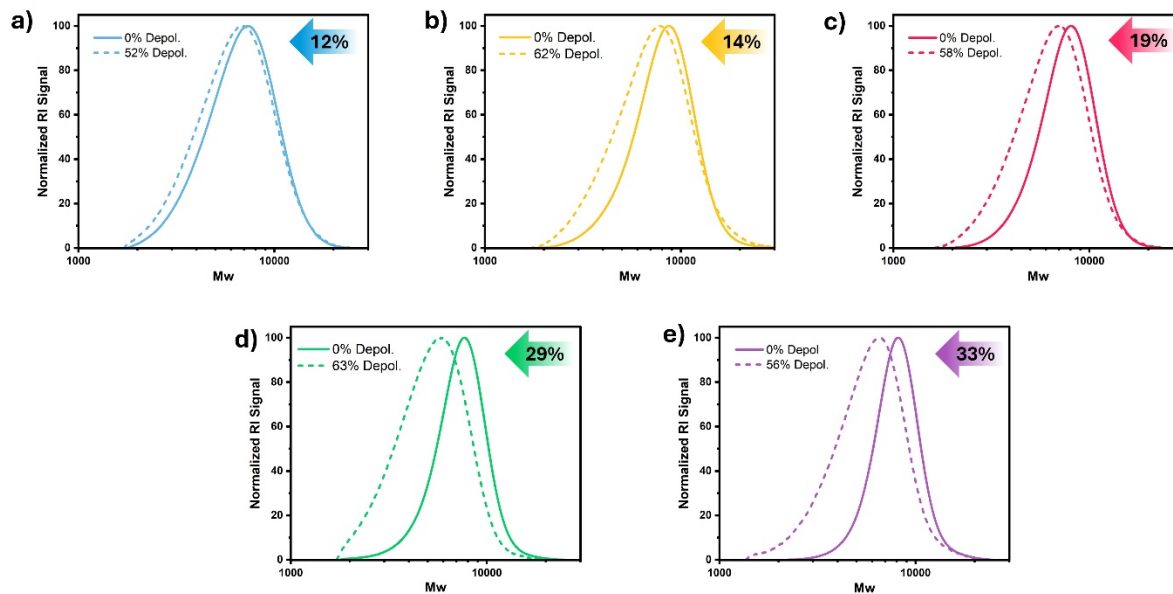

**Figure S 9:**  $M_n$  Shift of PMMA polymers containing a) *p*-OtBu, b) *p*-Ome, c) *p*-H, d) *p*-OCF<sub>3</sub>, and e) bis-*m*-CF<sub>3</sub> Z groups at similar conversions during depolymerization at 100 °C. (5 mM concentration, dioxane as the solvent)

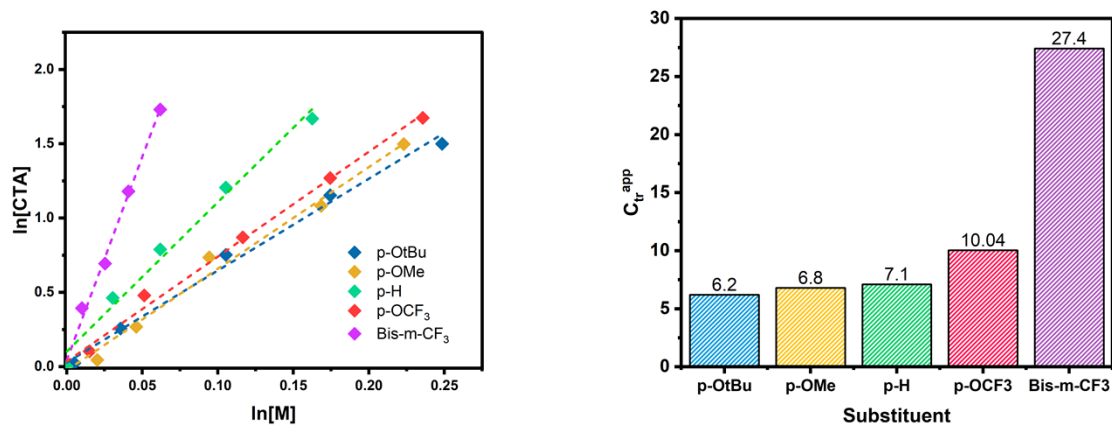

**Figure S 10:** The CTA concentration vs monomer concentration plotted through the kinetics experiments(left), Calculated  $C_{tr}$  values for polymers with bis-*m*-CF<sub>3</sub>, *p*-OCF<sub>3</sub>, *p*-H, *p*-OMe, *p*-OtBu Z- groups (right)

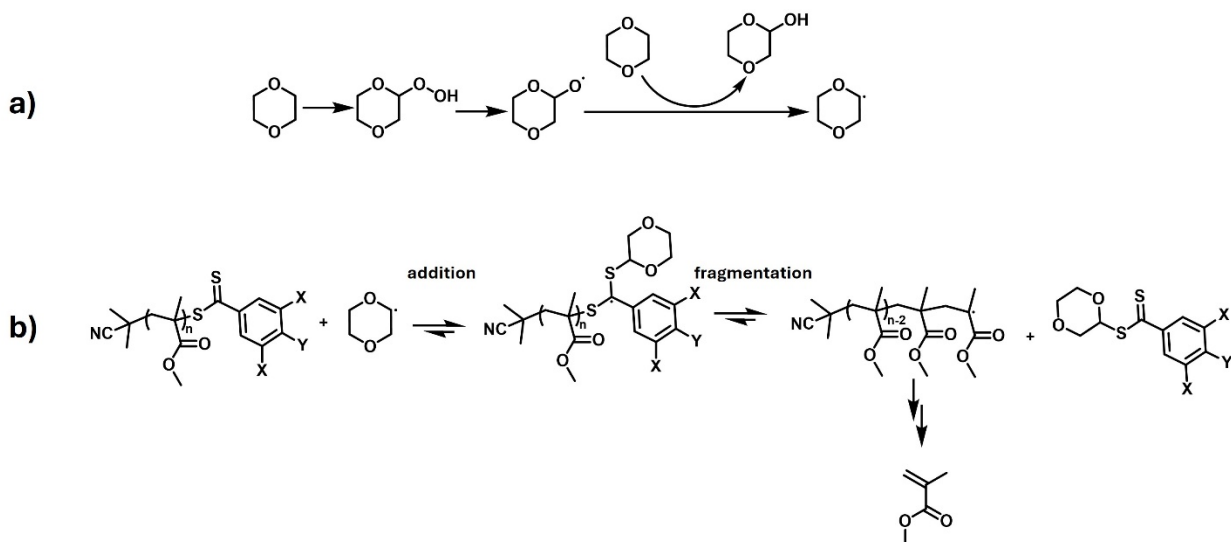

**Scheme S 1:** (a) Proposed mechanism leading to 1,4-dioxanyl radical. (b) Proposed mechanism of solvent-initiated thermal RAFT depolymerization in 1,4-dioxane through dioxane radical pathway

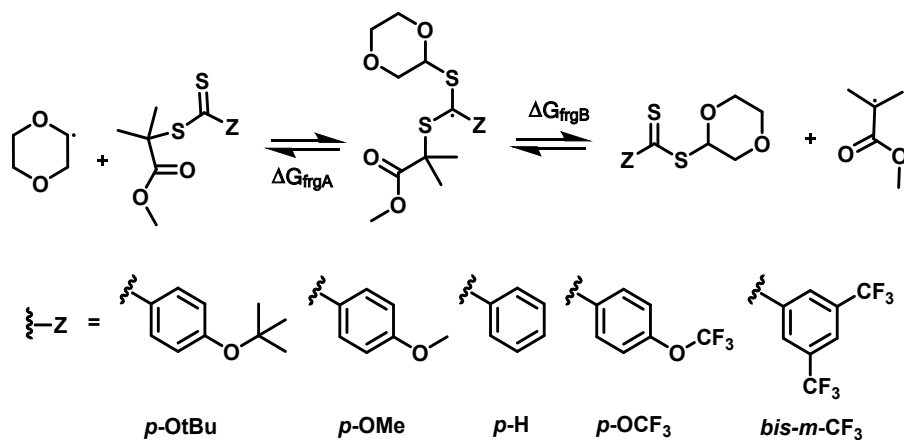

**Scheme S 2:** Model addition-fragmentation reactions studied.

**Table S 5:** Gibbs free fragmentation energies (kJ mol<sup>-1</sup>, 1,4-dioxane) calculated relative to the adduct radical in both directions.<sup>a</sup>

|                |                         | Temp in °C |       |       |
|----------------|-------------------------|------------|-------|-------|
|                |                         | 90         | 100   | 120   |
| <i>p</i> -OMe  | forming dioxane radical | 49.4       | 48.0  | 45.3  |
|                | forming MMA radical     | -8.7       | -10.4 | -13.8 |
| <i>p</i> -OtBu | forming dioxane radical | 49.8       | 48.4  | 45.6  |
|                | forming MMA radical     | -6.9       | -8.5  | -11.9 |
| <i>p</i> -H    | forming dioxane radical | 51.1       | 49.8  | 47.0  |
|                | forming MMA radical     | -6.3       | -8.0  | -11.4 |



|                                |                         |      |      |      |
|--------------------------------|-------------------------|------|------|------|
| <i>p</i> -OCF <sub>3</sub>     | forming dioxane radical | 52.1 | 50.6 | 47.8 |
|                                | forming MMA radical     | -0.4 | -2.1 | -5.4 |
| bis- <i>m</i> -CF <sub>3</sub> | forming dioxane radical | 58.3 | 56.7 | 53.4 |
|                                | forming MMA radical     | 2.4  | 0.5  | -3.4 |

<sup>a</sup> Calculated at the wB97X-D/aug-cc-pVTZ//M062X/6-31G(d) level of theory using the SMD solvent model.

### 3. Total energies

#### 3.1. Overall fragmentation processes

**Table S 6:** Electronic energies ( $E_e$ ), zero point energies ( $E_0$ ), enthalpy ( $H$ ), Gibbs free energies ( $G$ ), thermal corrections (TC) for  $T = 363.15$  K, and entropy ( $S$ ) in Hartree obtained at the SMD-(1,4-dioxane)-wB97X-D/aug-cc-pVTZ//SMD-(1,4-dioxane)-M062X/6-31G(d) level of theory

| <b>T=363.15K<br/>(90 °C)</b>                                      | $E_e$          | $E_0$          | $H_{363.15}$   | $G_{363.15}$   | $G_{363.15}$<br>(1M) | TC       | S       | TS       |
|-------------------------------------------------------------------|----------------|----------------|----------------|----------------|----------------------|----------|---------|----------|
| <b>Z-group substituent = <i>p</i>-H</b>                           |                |                |                |                |                      |          |         |          |
| adduct                                                            | -<br>1719.6592 | -<br>-1719.305 | -<br>1719.2719 | -<br>1719.3767 | -<br>1719.3728       | 0.386164 | 757.965 | 0.104839 |
| fragment A                                                        | -<br>1412.5967 | -<br>1412.3566 | -<br>1412.3321 | -<br>1412.4155 | -<br>1412.4116       | 0.263493 | 603.19  | 0.083431 |
| fragment B                                                        | -<br>1373.2419 | -<br>1373.0267 | -<br>1373.0064 | -<br>1373.0817 | -<br>1373.0778       | 0.234377 | 544.69  | 0.07534  |
| dioxane radical                                                   | -<br>307.01938 | -<br>306.90859 | -<br>306.89994 | -<br>-306.9456 | -<br>-306.9417       | 0.118291 | 330.125 | 0.045662 |
| MMA radical                                                       | -<br>346.39176 | -<br>346.25662 | -<br>346.24325 | -<br>-346.3013 | -<br>-346.2974       | 0.147358 | 419.704 | 0.058052 |
| <b>Z-group substituent = <i>p</i>-OtBu</b>                        |                |                |                |                |                      |          |         |          |
| adduct                                                            | -<br>1952.1503 | -<br>1951.6783 | -<br>1951.6358 | -<br>1951.7623 | -<br>1951.7584       | 0.51338  | 914.435 | 0.126481 |
| fragment A                                                        | -<br>1645.0882 | -<br>1644.7303 | -<br>1644.6964 | -<br>1644.8016 | -<br>1644.7977       | 0.390692 | 760.99  | 0.105257 |
| fragment B                                                        | -<br>1605.7335 | -<br>1605.4005 | -<br>1605.3708 | -<br>1605.4675 | -<br>1605.4636       | 0.361611 | 699.225 | 0.096714 |
| <b>Z-group substituent = <i>p</i>-OMe</b>                         |                |                |                |                |                      |          |         |          |
| adduct                                                            | -<br>1834.1929 | -<br>1833.8055 | -<br>1833.7688 | -<br>1833.8816 | -<br>1833.8777       | 0.423    | 815.608 | 0.112812 |
| fragment A                                                        | -<br>1527.1314 | -<br>1526.8577 | -<br>1526.8298 | -<br>1526.9211 | -<br>1526.9172       | 0.300462 | 659.926 | 0.091279 |
| fragment B                                                        | -<br>1487.7769 | -<br>1487.5282 | -<br>1487.5044 | -<br>1487.5875 | -<br>1487.5836       | 0.27133  | 600.952 | 0.083122 |
| <b>Z-group substituent = <i>p</i>-OCF<sub>3</sub></b>             |                |                |                |                |                      |          |         |          |
| adduct                                                            | -<br>2131.9751 | -<br>2131.6114 | -<br>2131.5721 | -<br>2131.6938 | -<br>2131.6899       | 0.401861 | 880.235 | 0.121751 |
| fragment A                                                        | -<br>1824.9116 | -<br>1824.6615 | -<br>-1824.631 | -<br>1824.7323 | -<br>1824.7284       | 0.279434 | 732.179 | 0.101272 |
| fragment B                                                        | -<br>1785.5565 | -<br>1785.3314 | -<br>1785.3051 | -<br>1785.3966 | -<br>1785.3927       | 0.250286 | 661.821 | 0.091541 |
| <b>Z-group substituent = <i>p</i>-bis-<i>m</i>-CF<sub>3</sub></b> |                |                |                |                |                      |          |         |          |
| adduct                                                            | -<br>2393.8401 | -<br>2393.4754 | -<br>2393.4325 | -<br>2393.5611 | -<br>2393.5572       | 0.406468 | 929.658 | 0.128587 |
| fragment A                                                        | -              | -              | -              | -              | -                    | 0.283551 | 798.492 | 0.110445 |

|            |            |            |            |            |            |          |         |          |
|------------|------------|------------|------------|------------|------------|----------|---------|----------|
|            | 2086.7714  | 2086.5213  | 2086.4867  | 2086.5972  | 2086.5933  |          |         |          |
| fragment B | -2047.4163 | -2047.1908 | -2047.1605 | -2047.2628 | -2047.2589 | 0.254596 | 739.207 | 0.102245 |

**Table S 7:** Electronic energies ( $E_e$ ), zero point energies ( $E_0$ ), enthalpy (H), Gibbs free energies (G), thermal corrections (TC) for T = 373.15 K, and entropy (S) in Hartree obtained at the SMD-(1,4-dioxane)-wb97X-D/aug-cc-pVTZ//SMD-(1,4-dioxane)-M062X/6-31G(d) level of theory

| T=373.15K<br>(100 °C)                               | $E_e$      | $E_0$     | $H_{373.15}$ | $G_{373.15}$ | $G_{373.15}$<br>(1M) | TC       | S       | TS       |
|-----------------------------------------------------|------------|-----------|--------------|--------------|----------------------|----------|---------|----------|
| <b>Z-group substituent = p-H</b>                    |            |           |              |              |                      |          |         |          |
| adduct                                              | -1719.6592 | -1719.305 | 1719.2702    | 1719.3796    | 1719.3756            | 0.387768 | 769.627 | 0.109383 |
| fragment A                                          | 1412.5967  | 1412.3566 | 1412.3309    | 1412.4178    | 1412.4138            | 0.264639 | 611.593 | 0.086923 |
| fragment B                                          | 1373.2419  | 1373.0267 | 1373.0054    | 1373.0838    | 1373.0798            | 0.235358 | 551.915 | 0.078441 |
| dioxane radical                                     | 307.01938  | 306.90859 | 306.89952    | 306.94686    | 306.94282            | 0.118678 | 333.11  | 0.047343 |
| MMA radical                                         | 346.39176  | 346.25662 | 346.24267    | 346.30291    | 346.29886            | 0.147904 | 423.818 | 0.060235 |
| <b>Z-group substituent = p-OtBu</b>                 |            |           |              |              |                      |          |         |          |
| adduct                                              | 1952.1503  | 1951.6783 | 1951.6337    | 1951.7658    | 1951.7618            | 0.515459 | 929.487 | 0.132104 |
| fragment A                                          | 1645.0882  | 1644.7303 | 1644.6947    | 1644.8045    | 1644.8005            | 0.392315 | 772.786 | 0.109832 |
| fragment B                                          | 1605.7335  | 1605.4005 | 1605.3693    | 1605.4702    | 1605.4661            | 0.363068 | 709.845 | 0.100887 |
| <b>Z-group substituent = p-OMe</b>                  |            |           |              |              |                      |          |         |          |
| adduct                                              | 1834.1929  | 1833.8055 | -1833.767    | 1833.8847    | 1833.8807            | 0.424766 | 828.427 | 0.11774  |
| fragment A                                          | 1527.1314  | 1526.8577 | 1526.8285    | 1526.9236    | 1526.9196            | 0.301769 | 669.479 | 0.09515  |
| fragment B                                          | 1487.7769  | 1487.5282 | 1487.5032    | 1487.5898    | 1487.5858            | 0.272474 | 609.333 | 0.086602 |
| <b>Z-group substituent = p-OCF<sub>3</sub></b>      |            |           |              |              |                      |          |         |          |
| adduct                                              | 2131.9751  | 2131.6114 | 2131.5702    | 2131.6972    | 2131.6932            | 0.403739 | 893.858 | 0.12704  |
| fragment A                                          | 1824.9116  | 1824.6615 | 1824.6296    | 1824.7351    | 1824.7311            | 0.280855 | 742.536 | 0.105533 |
| fragment B                                          | 1785.5565  | 1785.3314 | 1785.3038    | 1785.3991    | 1785.3951            | 0.251542 | 671.005 | 0.095367 |
| <b>Z-group substituent = p-bis-m-CF<sub>3</sub></b> |            |           |              |              |                      |          |         |          |
| adduct                                              | 2393.8401  | 2393.4754 | 2393.4304    | 2393.5646    | 2393.5606            | 0.408507 | 944.424 | 0.134227 |
| fragment A                                          | 2086.7714  | 2086.5213 | 2086.4851    | 2086.6002    | 2086.5962            | 0.285136 | 810.02  | 0.115124 |
| fragment B                                          | 2047.4163  | 2047.1908 | 2047.1591    | 2047.2656    | 2047.2616            | 0.256014 | 749.545 | 0.106529 |

**Table S 8:** Electronic energies ( $E_e$ ), zero point energies ( $E_0$ ), enthalpy (H), Gibbs free energies (G), thermal corrections (TC) for T = 393.15 K, and entropy (S) in Hartree obtained at the SMD-(1,4-dioxane)-wb97X-D/aug-cc-pVTZ//SMD-(1,4-dioxane)-M062X/6-31G(d) level of theory

| <b>T=393.15K<br/>(120 °C)</b>                                     | $E_e$          | $E_0$          | $H_{393.15}$   | $G_{393.15}$   | $G_{393.15}$<br>(1M) | TC       | S       | TS       |
|-------------------------------------------------------------------|----------------|----------------|----------------|----------------|----------------------|----------|---------|----------|
| <b>Z-group substituent = <i>p</i>-H</b>                           |                |                |                |                |                      |          |         |          |
| adduct                                                            | -<br>1719.6592 | -<br>-1719.305 | -<br>1719.2668 | -<br>1719.3856 | -<br>1719.3812       | 0.391083 | 792.779 | 0.118713 |
| fragment A                                                        | -<br>1412.5967 | -<br>1412.3566 | -<br>1412.3285 | -<br>1412.4226 | -<br>1412.4182       | 0.267006 | 628.244 | 0.094075 |
| fragment B                                                        | -<br>1373.2419 | -<br>1373.0267 | -<br>1373.0033 | -<br>1373.0881 | -<br>1373.0837       | 0.237393 | 566.293 | 0.084798 |
| dioxane radical                                                   | -<br>307.01938 | -<br>306.90859 | -<br>306.89865 | -<br>306.94942 | -<br>-306.9451       | 0.119484 | 339.068 | 0.050773 |
| MMA radical                                                       | -<br>346.39176 | -<br>346.25662 | -<br>346.24148 | -<br>346.30617 | -<br>346.30184       | 0.149027 | 431.953 | 0.064682 |
| <b>Z-group substituent = <i>p</i>-OtBu</b>                        |                |                |                |                |                      |          |         |          |
| adduct                                                            | -<br>1952.1503 | -<br>1951.6783 | -<br>1951.6293 | -<br>-1951.773 | -<br>1951.7687       | 0.519756 | 959.364 | 0.143658 |
| fragment A                                                        | -<br>1645.0882 | -<br>1644.7303 | -<br>1644.6913 | -<br>1644.8105 | -<br>1644.8062       | 0.395663 | 796.167 | 0.11922  |
| fragment B                                                        | -<br>1605.7335 | -<br>1605.4005 | -<br>1605.3662 | -<br>1605.4757 | -<br>1605.4713       | 0.366085 | 730.957 | 0.109456 |
| <b>Z-group substituent = <i>p</i>-OMe</b>                         |                |                |                |                |                      |          |         |          |
| adduct                                                            | -<br>1834.1929 | -<br>1833.8055 | -<br>1833.7633 | -<br>1833.8911 | -<br>1833.8868       | 0.428414 | 853.859 | 0.127859 |
| fragment A                                                        | -<br>1527.1314 | -<br>1526.8577 | -<br>1526.8257 | -<br>1526.9288 | -<br>1526.9245       | 0.304467 | 688.397 | 0.103083 |
| fragment B                                                        | -<br>1487.7769 | -<br>1487.5282 | -<br>1487.5008 | -<br>1487.5945 | -<br>1487.5902       | 0.274841 | 625.99  | 0.093738 |
| <b>Z-group substituent = <i>p</i>-OCF<sub>3</sub></b>             |                |                |                |                |                      |          |         |          |
| adduct                                                            | -<br>2131.9751 | -<br>2131.6114 | -<br>2131.5662 | -<br>2131.7041 | -<br>2131.6998       | 0.407616 | 920.855 | 0.137892 |
| fragment A                                                        | -<br>1824.9116 | -<br>1824.6615 | -<br>1824.6266 | -<br>1824.7408 | -<br>1824.7365       | 0.283781 | 763.02  | 0.114257 |
| fragment B                                                        | -<br>1785.5565 | -<br>1785.3314 | -<br>1785.3011 | -<br>1785.4043 | -<br>-1785.4         | 0.254137 | 689.223 | 0.103206 |
| <b>Z-group substituent = <i>p</i>-bis-<i>m</i>-CF<sub>3</sub></b> |                |                |                |                |                      |          |         |          |
| adduct                                                            | -<br>2393.8401 | -<br>2393.4754 | -<br>2393.4262 | -<br>-2393.572 | -<br>2393.5676       | 0.412709 | 973.652 | 0.145797 |
| fragment A                                                        | -<br>2086.7714 | -<br>2086.5213 | -<br>2086.4818 | -<br>2086.6065 | -<br>2086.6022       | 0.288394 | 832.783 | 0.124703 |
| fragment B                                                        | -<br>2047.4163 | -<br>2047.1908 | -<br>2047.1561 | -<br>2047.2714 | -<br>2047.2671       | 0.258937 | 770.012 | 0.115304 |

#### 4. Cartesian coordinates

Cartesian coordinates (in Å) for all structures optimized at the SMD-(1,4-dioxane)-M062X/6-31G(d) level of theory along with their charges and multiplicities. The number of imaginary frequencies is zero for all structures.

## 4.1 Structures used to evaluated addition-fragmentation reactions

dioxane radical

0 2

|   |           |           |           |
|---|-----------|-----------|-----------|
| C | 1.370763  | -0.048561 | -0.200873 |
| C | -0.544815 | 1.274829  | -0.156609 |
| C | -1.398102 | 0.076299  | 0.112446  |
| C | 0.516176  | -1.213476 | 0.259272  |
| H | 1.476810  | -0.079324 | -1.292599 |
| H | 2.360148  | -0.069897 | 0.261686  |
| H | -1.623421 | -0.006976 | 1.195037  |
| H | -2.349343 | 0.158684  | -0.420211 |
| H | 0.446180  | -1.214831 | 1.359211  |
| H | 0.953816  | -2.160846 | -0.066625 |
| H | -0.950125 | 2.267574  | 0.013067  |
| O | 0.775795  | 1.195033  | 0.170824  |
| O | -0.773070 | -1.123648 | -0.312697 |

MMA radical

0 2

|   |           |           |           |
|---|-----------|-----------|-----------|
| C | -0.276807 | -0.364326 | -0.000168 |
| C | 1.091712  | 0.119396  | -0.000412 |
| C | 2.200364  | -0.871005 | 0.000226  |
| C | 1.378101  | 1.583128  | -0.000072 |
| H | 2.454858  | 1.770526  | -0.004505 |
| H | 0.943989  | 2.073937  | 0.879735  |
| H | 0.935971  | 2.076082  | -0.874542 |
| O | -0.608769 | -1.538591 | -0.000109 |
| O | -1.178866 | 0.645649  | 0.000025  |
| C | -2.539938 | 0.228061  | 0.000137  |
| H | -3.133176 | 1.142460  | -0.000591 |
| H | -2.763536 | -0.366544 | 0.889642  |
| H | -2.763306 | -0.367883 | -0.888512 |
| H | 1.818000  | -1.892548 | 0.000546  |
| H | 2.844038  | -0.732360 | -0.879008 |
| H | 2.843647  | -0.731664 | 0.879639  |

**Z-group substituent = *p*-H**

adduct

0 2

|   |           |           |           |
|---|-----------|-----------|-----------|
| C | -3.751638 | -1.856545 | -0.099460 |
| C | -1.530137 | -1.179151 | -0.010755 |
| C | -1.155144 | -2.490693 | 0.665362  |
| C | -3.379069 | -3.159386 | 0.584655  |
| H | -4.044199 | -1.113088 | 0.657295  |
| H | -4.574285 | -1.995059 | -0.805398 |
| H | -0.870121 | -3.224419 | -0.105277 |
| H | -0.318513 | -2.346973 | 1.355042  |
| H | -3.158659 | -3.925255 | -0.174897 |
| H | -4.195090 | -3.512863 | 1.220458  |
| H | -1.736372 | -0.404018 | 0.739141  |

|   |           |           |           |
|---|-----------|-----------|-----------|
| O | -2.646974 | -1.365559 | -0.851718 |
| O | -2.252116 | -2.965988 | 1.421209  |
| S | -0.199740 | -0.594203 | -1.128315 |
| C | 1.026355  | -0.104708 | 0.032702  |
| S | 0.602694  | 1.047370  | 1.288553  |
| C | 0.198446  | 2.598871  | 0.352181  |
| C | -1.049843 | 2.452409  | -0.517576 |
| O | -1.120535 | 2.840317  | -1.657619 |
| C | 1.379303  | 3.019241  | -0.511698 |
| H | 2.261222  | 3.179286  | 0.114698  |
| H | 1.611839  | 2.259433  | -1.263480 |
| H | 1.142253  | 3.948973  | -1.036577 |
| C | -0.102920 | 3.643008  | 1.435926  |
| H | -0.376988 | 4.590259  | 0.959258  |
| H | -0.927859 | 3.326541  | 2.079185  |
| H | 0.784317  | 3.813840  | 2.052662  |
| O | -2.086471 | 1.933906  | 0.153067  |
| C | -3.280890 | 1.776002  | -0.617206 |
| H | -3.109119 | 1.077939  | -1.439292 |
| H | -4.025155 | 1.376722  | 0.071990  |
| H | -3.610559 | 2.739938  | -1.011545 |
| C | 2.365569  | -0.641358 | -0.060016 |
| C | 2.636549  | -1.826421 | -0.786099 |
| C | 3.458131  | -0.000831 | 0.572857  |
| C | 3.923662  | -2.332342 | -0.873461 |
| H | 1.819946  | -2.352021 | -1.268657 |
| C | 4.740717  | -0.516481 | 0.479528  |
| H | 3.284490  | 0.913147  | 1.129602  |
| C | 4.986341  | -1.684071 | -0.243736 |
| H | 4.099349  | -3.246470 | -1.432566 |
| H | 5.559565  | 0.000705  | 0.970554  |
| H | 5.992858  | -2.083967 | -0.314738 |

fragment A

|     |           |           |           |
|-----|-----------|-----------|-----------|
| 0 1 |           |           |           |
| S   | 0.035920  | -1.427437 | -1.200291 |
| C   | -0.604050 | -0.135827 | -0.414991 |
| S   | 0.275693  | 1.269720  | 0.131579  |
| C   | 2.044076  | 0.999421  | -0.286871 |
| C   | 2.577230  | -0.362286 | 0.163149  |
| O   | 3.471589  | -0.935816 | -0.406441 |
| C   | 2.796598  | 2.058039  | 0.540183  |
| H   | 2.463517  | 3.064682  | 0.269651  |
| H   | 2.647076  | 1.911387  | 1.613123  |
| H   | 3.865710  | 1.981373  | 0.318722  |
| C   | 2.297204  | 1.212115  | -1.775947 |
| H   | 3.360858  | 1.067615  | -1.982628 |
| H   | 1.732764  | 0.501340  | -2.382618 |
| H   | 2.014512  | 2.229945  | -2.057535 |
| O   | 2.042295  | -0.769836 | 1.317170  |
| C   | 2.520178  | -2.032372 | 1.784734  |
| H   | 1.969613  | -2.236660 | 2.702051  |
| H   | 2.322016  | -2.807820 | 1.040744  |
| H   | 3.593135  | -1.986678 | 1.984465  |
| C   | -2.053678 | -0.033540 | -0.094062 |

|   |           |           |           |
|---|-----------|-----------|-----------|
| C | -2.996603 | -0.515031 | -1.011836 |
| C | -2.498422 | 0.525928  | 1.111749  |
| C | -4.354010 | -0.426012 | -0.734568 |
| H | -2.652100 | -0.946152 | -1.945994 |
| C | -3.858945 | 0.597735  | 1.390998  |
| H | -1.780147 | 0.872692  | 1.847899  |
| C | -4.789164 | 0.128519  | 0.468037  |
| H | -5.074926 | -0.790819 | -1.459393 |
| H | -4.190445 | 1.016721  | 2.335794  |
| H | -5.850948 | 0.190908  | 0.685834  |

fragment B

0 1

|   |           |           |           |
|---|-----------|-----------|-----------|
| C | 3.533766  | 0.696525  | 1.089947  |
| C | 1.913438  | -0.140578 | -0.338326 |
| C | 2.930110  | -1.092269 | -0.963950 |
| C | 4.560188  | -0.232434 | 0.468380  |
| H | 3.532678  | 1.664819  | 0.568116  |
| H | 3.734747  | 0.861868  | 2.151109  |
| H | 2.908655  | -2.058634 | -0.435360 |
| H | 2.716841  | -1.253564 | -2.023647 |
| H | 4.607980  | -1.168486 | 1.045722  |
| H | 5.551386  | 0.227972  | 0.452826  |
| H | 1.887333  | 0.800609  | -0.905261 |
| O | 2.241494  | 0.104216  | 1.007383  |
| O | 4.214877  | -0.511803 | -0.879196 |
| S | 0.264810  | -0.882355 | -0.407512 |
| C | -0.797773 | 0.495122  | -0.122103 |
| S | -0.317862 | 2.056189  | -0.021995 |
| C | -2.218338 | 0.075330  | -0.004865 |
| C | -2.575660 | -1.119073 | 0.636176  |
| C | -3.224812 | 0.890685  | -0.540185 |
| C | -3.913476 | -1.484333 | 0.741645  |
| H | -1.811321 | -1.744823 | 1.085913  |
| C | -4.556943 | 0.512251  | -0.447036 |
| H | -2.946907 | 1.812966  | -1.039437 |
| C | -4.905406 | -0.674786 | 0.195942  |
| H | -4.179136 | -2.401918 | 1.256919  |
| H | -5.326350 | 1.145310  | -0.877620 |
| H | -5.948600 | -0.965389 | 0.273572  |

**Z-group substituent = *p*-OtBu**

adduct

0 2

|   |          |           |           |
|---|----------|-----------|-----------|
| C | 4.613632 | -2.556002 | 0.348447  |
| C | 2.607052 | -1.423624 | 0.039340  |
| C | 2.053257 | -2.613026 | -0.732624 |
| C | 4.064344 | -3.737147 | -0.430639 |
| H | 5.141951 | -1.875887 | -0.336589 |
| H | 5.299365 | -2.878727 | 1.135812  |
| H | 1.532988 | -3.285772 | -0.032582 |
| H | 1.353087 | -2.283288 | -1.505360 |

|   |           |           |           |
|---|-----------|-----------|-----------|
| H | 3.600112  | -4.453578 | 0.264532  |
| H | 4.859793  | -4.242662 | -0.984525 |
| H | 3.058237  | -0.694999 | -0.647503 |
| O | 3.552343  | -1.858449 | 0.992081  |
| O | 3.111140  | -3.293603 | -1.380070 |
| S | 1.304129  | -0.591461 | 1.023967  |
| C | 0.354022  | 0.169618  | -0.246008 |
| S | 1.154323  | 1.241705  | -1.384212 |
| C | 1.751020  | 2.645925  | -0.327100 |
| C | 2.837138  | 2.217621  | 0.659492  |
| O | 2.857907  | 2.551829  | 1.818520  |
| C | 0.588838  | 3.272403  | 0.430621  |
| H | -0.166958 | 3.629326  | -0.274480 |
| H | 0.125849  | 2.553183  | 1.112434  |
| H | 0.946392  | 4.116914  | 1.026469  |
| C | 2.377862  | 3.641385  | -1.312883 |
| H | 2.783506  | 4.494077  | -0.757891 |
| H | 3.188225  | 3.182793  | -1.885201 |
| H | 1.618749  | 4.013868  | -2.006961 |
| O | 3.813617  | 1.511169  | 0.075897  |
| C | 4.854744  | 1.084215  | 0.958113  |
| H | 4.451115  | 0.412272  | 1.718582  |
| H | 5.575670  | 0.559807  | 0.330743  |
| H | 5.327074  | 1.945338  | 1.436469  |
| C | -1.064052 | -0.078316 | -0.333994 |
| C | -1.663206 | -1.191316 | 0.306942  |
| C | -1.919046 | 0.776678  | -1.073076 |
| C | -3.025007 | -1.421173 | 0.227537  |
| H | -1.038271 | -1.886957 | 0.856008  |
| C | -3.279983 | 0.542213  | -1.150958 |
| H | -1.496152 | 1.634935  | -1.582953 |
| C | -3.851850 | -0.551036 | -0.491143 |
| H | -3.466392 | -2.290363 | 0.705049  |
| H | -3.921414 | 1.200893  | -1.728068 |
| O | -5.185778 | -0.814761 | -0.621970 |
| C | -6.104092 | -0.258354 | 0.357742  |
| C | -6.050439 | 1.266033  | 0.332705  |
| H | -5.073215 | 1.638471  | 0.655626  |
| H | -6.254679 | 1.641208  | -0.675291 |
| H | -6.806451 | 1.674623  | 1.010753  |
| C | -7.462906 | -0.758056 | -0.111160 |
| H | -8.252945 | -0.398817 | 0.554969  |
| H | -7.669267 | -0.400671 | -1.124328 |
| H | -7.482298 | -1.851855 | -0.119740 |
| C | -5.785246 | -0.788877 | 1.752081  |
| H | -5.796111 | -1.883573 | 1.758522  |
| H | -4.806045 | -0.444707 | 2.099293  |
| H | -6.537471 | -0.434217 | 2.463860  |

fragment A

|     |          |           |           |
|-----|----------|-----------|-----------|
| O 1 |          |           |           |
| S   | 1.918314 | 1.275776  | -1.442046 |
| C   | 1.070356 | 0.127615  | -0.628708 |
| S   | 1.766264 | -1.115227 | 0.385657  |
| C   | 3.580367 | -1.080931 | 0.104891  |

|   |           |           |           |
|---|-----------|-----------|-----------|
| C | 4.208666  | 0.293786  | 0.344766  |
| O | 5.200281  | 0.670598  | -0.228196 |
| C | 3.937525  | -1.603671 | -1.282350 |
| H | 3.585559  | -2.632877 | -1.391334 |
| H | 3.497071  | -0.988477 | -2.069631 |
| H | 5.023588  | -1.583524 | -1.404296 |
| C | 4.149377  | -2.012307 | 1.191389  |
| H | 5.237646  | -2.053706 | 1.082805  |
| H | 3.909786  | -1.652661 | 2.195620  |
| H | 3.755326  | -3.026221 | 1.073605  |
| O | 3.626590  | 0.957020  | 1.347463  |
| C | 4.187936  | 2.241675  | 1.619099  |
| H | 4.121957  | 2.875350  | 0.731175  |
| H | 3.592888  | 2.660021  | 2.429855  |
| H | 5.233652  | 2.148613  | 1.920969  |
| C | -0.412733 | 0.066388  | -0.637605 |
| C | -1.154250 | 1.254605  | -0.709927 |
| C | -1.101524 | -1.154858 | -0.593356 |
| C | -2.539531 | 1.225834  | -0.714820 |
| H | -0.628808 | 2.202782  | -0.752571 |
| C | -2.489344 | -1.186470 | -0.614036 |
| H | -0.550814 | -2.089865 | -0.583776 |
| C | -3.217198 | 0.003998  | -0.658917 |
| H | -3.114443 | 2.144357  | -0.772235 |
| H | -3.022381 | -2.131482 | -0.616395 |
| O | -4.579246 | -0.025067 | -0.738114 |
| C | -5.350160 | -0.012698 | 0.495258  |
| C | -5.070873 | 1.262383  | 1.284363  |
| H | -4.033129 | 1.302657  | 1.630049  |
| H | -5.272221 | 2.146278  | 0.670719  |
| H | -5.719703 | 1.301238  | 2.165068  |
| C | -5.039265 | -1.248782 | 1.333340  |
| H | -5.211484 | -2.160455 | 0.752294  |
| H | -4.003531 | -1.246171 | 1.686902  |
| H | -5.692991 | -1.273136 | 2.210956  |
| C | -6.791149 | -0.041088 | 0.007027  |
| H | -7.481518 | -0.033375 | 0.855668  |
| H | -6.996508 | 0.831445  | -0.620028 |
| H | -6.973394 | -0.942861 | -0.584900 |

fragment B

0 1

|   |           |           |           |
|---|-----------|-----------|-----------|
| C | -5.649635 | -1.261172 | -0.651572 |
| C | -3.609806 | -0.265805 | -0.143068 |
| C | -4.180908 | 0.230106  | 1.179859  |
| C | -6.219768 | -0.758644 | 0.661365  |
| H | -5.850341 | -0.531182 | -1.449371 |
| H | -6.078398 | -2.226239 | -0.931925 |
| H | -3.978363 | -0.520626 | 1.959928  |
| H | -3.728135 | 1.182871  | 1.462851  |
| H | -6.087179 | -1.525003 | 1.440643  |
| H | -7.284473 | -0.531664 | 0.562463  |
| H | -3.708089 | 0.508149  | -0.916792 |
| O | -4.243814 | -1.462859 | -0.532755 |
| O | -5.571343 | 0.441269  | 1.044758  |



|   |           |           |           |
|---|-----------|-----------|-----------|
| S | -1.849815 | -0.720278 | 0.003090  |
| C | -0.998689 | 0.778485  | -0.321951 |
| S | -1.706789 | 2.253922  | -0.479216 |
| C | 0.467052  | 0.575376  | -0.412276 |
| C | 1.018161  | -0.603427 | -0.937874 |
| C | 1.335023  | 1.588732  | 0.020880  |
| C | 2.393933  | -0.765924 | -1.021400 |
| H | 0.370505  | -1.384296 | -1.323645 |
| C | 2.708711  | 1.422483  | -0.048657 |
| H | 0.917479  | 2.505631  | 0.423089  |
| C | 3.247977  | 0.239395  | -0.563087 |
| H | 2.820773  | -1.661803 | -1.460063 |
| H | 3.381099  | 2.206400  | 0.284205  |
| O | 4.598858  | 0.107454  | -0.697178 |
| C | 5.352449  | -0.504714 | 0.386573  |
| C | 4.895868  | -1.942874 | 0.609405  |
| H | 3.863155  | -1.987058 | 0.969090  |
| H | 4.971242  | -2.518250 | -0.318849 |
| H | 5.533026  | -2.419656 | 1.360936  |
| C | 5.207344  | 0.315752  | 1.664111  |
| H | 5.510817  | 1.353287  | 1.491443  |
| H | 4.176943  | 0.306846  | 2.033251  |
| H | 5.847580  | -0.103054 | 2.446910  |
| C | 6.786584  | -0.466344 | -0.120516 |
| H | 7.464323  | -0.903755 | 0.618459  |
| H | 6.874191  | -1.030514 | -1.053683 |
| H | 7.094129  | 0.566147  | -0.310288 |

**Z-group substituent = *p*-OMe**

adduct

0 2

|   |           |           |           |
|---|-----------|-----------|-----------|
| C | 3.571680  | 2.842873  | -0.137894 |
| C | 1.673331  | 1.506988  | -0.004969 |
| C | 0.933741  | 2.628065  | 0.711028  |
| C | 2.836151  | 3.956395  | 0.585342  |
| H | 4.105099  | 2.217723  | 0.593967  |
| H | 4.287508  | 3.239969  | -0.862014 |
| H | 0.410396  | 3.246859  | -0.035113 |
| H | 0.206178  | 2.222651  | 1.419734  |
| H | 2.364420  | 4.625553  | -0.150792 |
| H | 3.522763  | 4.537812  | 1.206361  |
| H | 2.134906  | 0.824826  | 0.722118  |
| O | 2.650269  | 2.042942  | -0.870973 |
| O | 1.852892  | 3.411983  | 1.447538  |
| S | 0.555657  | 0.549478  | -1.097181 |
| C | -0.433360 | -0.293084 | 0.091403  |
| S | 0.355978  | -1.301315 | 1.293446  |
| C | 1.167177  | -2.636612 | 0.292496  |
| C | 2.301039  | -2.104293 | -0.583402 |
| O | 2.468971  | -2.429275 | -1.733051 |
| C | 0.140704  | -3.351112 | -0.575290 |
| H | -0.645308 | -3.779253 | 0.052995  |
| H | -0.315937 | -2.665544 | -1.294944 |

|   |           |           |           |
|---|-----------|-----------|-----------|
| H | 0.624669  | -4.154762 | -1.137422 |
| C | 1.782867  | -3.586835 | 1.328846  |
| H | 2.313987  | -4.393016 | 0.811453  |
| H | 2.490649  | -3.066511 | 1.979271  |
| H | 0.996733  | -4.033734 | 1.944480  |
| O | 3.144344  | -1.312716 | 0.091728  |
| C | 4.217135  | -0.776287 | -0.685808 |
| H | 3.822836  | -0.141025 | -1.482089 |
| H | 4.818073  | -0.187923 | 0.007950  |
| H | 4.817399  | -1.581223 | -1.116202 |
| C | -1.866300 | -0.154320 | 0.071164  |
| C | -2.503250 | 0.903565  | -0.617859 |
| C | -2.712705 | -1.075073 | 0.745870  |
| C | -3.882721 | 1.042224  | -0.641272 |
| H | -1.896826 | 1.638962  | -1.135024 |
| C | -4.082713 | -0.941781 | 0.726681  |
| H | -2.268372 | -1.907314 | 1.280180  |
| C | -4.687944 | 0.118210  | 0.032777  |
| H | -4.319110 | 1.876193  | -1.178548 |
| H | -4.721484 | -1.654469 | 1.238328  |
| O | -6.037942 | 0.161073  | 0.074095  |
| C | -6.681720 | 1.211722  | -0.621488 |
| H | -6.459393 | 1.173844  | -1.694179 |
| H | -7.751063 | 1.063611  | -0.469294 |
| H | -6.391216 | 2.190259  | -0.221919 |

fragment A

|     |           |           |           |
|-----|-----------|-----------|-----------|
| O 1 |           |           |           |
| S   | -0.773257 | 1.244250  | 1.339876  |
| C   | -0.095490 | 0.064564  | 0.414401  |
| S   | -0.991952 | -1.131764 | -0.497043 |
| C   | -2.742158 | -1.019838 | 0.045469  |
| C   | -3.338229 | 0.382305  | -0.098176 |
| O   | -4.220022 | 0.796016  | 0.612717  |
| C   | -2.919337 | -1.538816 | 1.468345  |
| H   | -2.598244 | -2.582311 | 1.523643  |
| H   | -2.346088 | -0.948254 | 2.185838  |
| H   | -3.975211 | -1.475594 | 1.744090  |
| C   | -3.502713 | -1.916391 | -0.949480 |
| H   | -4.564944 | -1.910404 | -0.685830 |
| H   | -3.393752 | -1.559572 | -1.977142 |
| H   | -3.141491 | -2.947511 | -0.891082 |
| O   | -2.879492 | 1.028583  | -1.173302 |
| C   | -3.416155 | 2.339021  | -1.355628 |
| H   | -2.925765 | 2.739994  | -2.241722 |
| H   | -4.497499 | 2.294766  | -1.504244 |
| H   | -3.194958 | 2.959475  | -0.483592 |
| C   | 1.365607  | -0.066670 | 0.218384  |
| C   | 2.176353  | 1.073741  | 0.256572  |
| C   | 1.983717  | -1.311302 | -0.004967 |
| C   | 3.549279  | 0.995815  | 0.069701  |
| H   | 1.714326  | 2.041439  | 0.421456  |
| C   | 3.350960  | -1.404088 | -0.178188 |
| H   | 1.392195  | -2.221039 | -0.007385 |
| C   | 4.146162  | -0.250963 | -0.147662 |

|   |          |           |           |
|---|----------|-----------|-----------|
| H | 4.140064 | 1.903694  | 0.091204  |
| H | 3.834289 | -2.363174 | -0.330584 |
| O | 5.468400 | -0.440838 | -0.333916 |
| C | 6.310878 | 0.697052  | -0.292004 |
| H | 6.254062 | 1.197629  | 0.681208  |
| H | 7.323857 | 0.326390  | -0.448933 |
| H | 6.058162 | 1.408026  | -1.086847 |

fragment B

0 1

|   |           |           |           |
|---|-----------|-----------|-----------|
| C | -4.778009 | -1.078799 | -0.686311 |
| C | -2.690629 | -0.201531 | -0.151552 |
| C | -3.319589 | 0.606699  | 0.976883  |
| C | -5.403525 | -0.267821 | 0.432573  |
| H | -4.818663 | -0.509793 | -1.626695 |
| H | -5.288998 | -2.034863 | -0.822966 |
| H | -3.277898 | 0.016113  | 1.905637  |
| H | -2.786907 | 1.549537  | 1.118524  |
| H | -5.431901 | -0.868582 | 1.354767  |
| H | -6.421439 | 0.034417  | 0.172837  |
| H | -2.625273 | 0.404173  | -1.065929 |
| O | -3.422426 | -1.386172 | -0.373063 |
| O | -4.658242 | 0.917613  | 0.647641  |
| S | -1.017619 | -0.786008 | 0.278361  |
| C | 0.034563  | 0.520079  | -0.242190 |
| S | -0.486239 | 1.997649  | -0.748536 |
| C | 1.463730  | 0.156716  | -0.146538 |
| C | 1.913433  | -1.166246 | -0.320156 |
| C | 2.416872  | 1.147201  | 0.119525  |
| C | 3.256380  | -1.475939 | -0.235797 |
| H | 1.209277  | -1.955952 | -0.561627 |
| C | 3.767692  | 0.846439  | 0.221412  |
| H | 2.086058  | 2.170245  | 0.264349  |
| C | 4.195879  | -0.473446 | 0.040581  |
| H | 3.609732  | -2.489958 | -0.388941 |
| H | 4.472458  | 1.638458  | 0.444371  |
| O | 5.481217  | -0.873227 | 0.111277  |
| C | 6.464962  | 0.111117  | 0.376562  |
| H | 6.300924  | 0.583052  | 1.351965  |
| H | 7.420134  | -0.413861 | 0.385459  |
| H | 6.479272  | 0.878231  | -0.405732 |

**Z-group substituent = *p*-OCF<sub>3</sub>**

adduct

0 2

|   |          |           |           |
|---|----------|-----------|-----------|
| C | 4.595003 | -2.535570 | 0.356303  |
| C | 2.583359 | -1.413120 | 0.040878  |
| C | 2.036587 | -2.606890 | -0.729934 |
| C | 4.052304 | -3.720539 | -0.421180 |
| H | 5.122004 | -1.854648 | -0.328728 |
| H | 5.279416 | -2.852975 | 1.146773  |
| H | 1.518631 | -3.281041 | -0.029491 |

|   |           |           |           |
|---|-----------|-----------|-----------|
| H | 1.336204  | -2.282137 | -1.504725 |
| H | 3.589105  | -4.437566 | 0.273864  |
| H | 4.850734  | -4.223668 | -0.972710 |
| H | 3.029250  | -0.681333 | -0.645725 |
| O | 3.528565  | -1.840362 | 0.995633  |
| O | 3.099235  | -3.281841 | -1.373669 |
| S | 1.272275  | -0.592504 | 1.027099  |
| C | 0.319849  | 0.167082  | -0.238445 |
| S | 1.109229  | 1.240727  | -1.381084 |
| C | 1.715901  | 2.643047  | -0.325063 |
| C | 2.812759  | 2.214099  | 0.649413  |
| O | 2.841411  | 2.542192  | 1.809692  |
| C | 0.559846  | 3.265609  | 0.445123  |
| H | -0.203856 | 3.622632  | -0.251314 |
| H | 0.105547  | 2.546048  | 1.132394  |
| H | 0.922423  | 4.110372  | 1.037425  |
| C | 2.330138  | 3.640786  | -1.316484 |
| H | 2.739739  | 4.492885  | -0.763631 |
| H | 3.135591  | 3.185165  | -1.897937 |
| H | 1.563042  | 4.013605  | -2.001500 |
| O | 3.786722  | 1.515262  | 0.053090  |
| C | 4.843843  | 1.097475  | 0.921586  |
| H | 4.457287  | 0.418471  | 1.684617  |
| H | 5.563391  | 0.584521  | 0.283425  |
| H | 5.311262  | 1.962763  | 1.397007  |
| C | -1.101263 | -0.083902 | -0.321013 |
| C | -1.689623 | -1.202252 | 0.318798  |
| C | -1.957004 | 0.779597  | -1.047594 |
| C | -3.051207 | -1.440245 | 0.242238  |
| H | -1.061077 | -1.893467 | 0.868390  |
| C | -3.318345 | 0.542516  | -1.128063 |
| H | -1.538583 | 1.648062  | -1.542674 |
| C | -3.852899 | -0.565792 | -0.481589 |
| H | -3.498811 | -2.302028 | 0.725818  |
| H | -3.972588 | 1.207136  | -1.682167 |
| O | -5.218568 | -0.835629 | -0.603393 |
| C | -6.006444 | -0.273863 | 0.337153  |
| F | -5.933363 | 1.060891  | 0.326015  |
| F | -7.257362 | -0.629628 | 0.088991  |
| F | -5.685776 | -0.675659 | 1.570667  |

fragment A

0 1

|   |           |           |           |
|---|-----------|-----------|-----------|
| S | -1.915158 | -1.405600 | -1.288641 |
| C | -1.054677 | -0.289889 | -0.446292 |
| S | -1.721940 | 1.078337  | 0.409679  |
| C | -3.489593 | 1.199069  | -0.072892 |
| C | -4.275117 | -0.092569 | 0.166875  |
| O | -5.231587 | -0.409533 | -0.494808 |
| C | -3.638861 | 1.662626  | -1.517801 |
| H | -3.171513 | 2.642978  | -1.641778 |
| H | -3.184134 | 0.957110  | -2.216333 |
| H | -4.701746 | 1.741517  | -1.760298 |
| C | -4.073557 | 2.248253  | 0.891077  |
| H | -5.133419 | 2.387800  | 0.656560  |

|   |           |           |           |
|---|-----------|-----------|-----------|
| H | -3.983064 | 1.931667  | 1.933565  |
| H | -3.566393 | 3.209680  | 0.765952  |
| O | -3.872238 | -0.743458 | 1.261116  |
| C | -4.586459 | -1.949758 | 1.535215  |
| H | -4.493661 | -2.640202 | 0.693206  |
| H | -4.124019 | -2.372141 | 2.426279  |
| H | -5.642695 | -1.738123 | 1.715985  |
| C | 0.421035  | -0.373361 | -0.289772 |
| C | 1.038131  | -1.628831 | -0.191484 |
| C | 1.224196  | 0.771792  | -0.250623 |
| C | 2.409596  | -1.731702 | -0.046648 |
| H | 0.427698  | -2.524872 | -0.217008 |
| C | 2.606271  | 0.683915  | -0.121966 |
| H | 0.777116  | 1.754538  | -0.356851 |
| C | 3.186121  | -0.575682 | -0.015587 |
| H | 2.897117  | -2.696056 | 0.044898  |
| H | 3.199329  | 1.589266  | -0.114937 |
| O | 4.544272  | -0.807381 | 0.121303  |
| C | 5.404400  | 0.231505  | 0.195805  |
| F | 5.144933  | 1.030433  | 1.233854  |
| F | 6.619914  | -0.267279 | 0.340907  |
| F | 5.384094  | 0.986160  | -0.906114 |

fragment B

0 1

|   |           |           |           |
|---|-----------|-----------|-----------|
| C | -5.302487 | 0.629878  | -1.094196 |
| C | -3.673059 | -0.168796 | 0.345607  |
| C | -4.667277 | -1.153592 | 0.956062  |
| C | -6.307482 | -0.331469 | -0.487163 |
| H | -5.333844 | 1.595170  | -0.567868 |
| H | -5.497454 | 0.794567  | -2.156530 |
| H | -4.613823 | -2.115680 | 0.421985  |
| H | -4.459655 | -1.315204 | 2.016827  |
| H | -6.322983 | -1.265241 | -1.069841 |
| H | -7.311540 | 0.100283  | -0.478291 |
| H | -3.680161 | 0.769053  | 0.918508  |
| O | -3.994433 | 0.074034  | -1.001603 |
| O | -5.966455 | -0.608146 | 0.862200  |
| S | -2.003136 | -0.861534 | 0.424719  |
| C | -0.982727 | 0.546672  | 0.134108  |
| S | -1.508822 | 2.093445  | 0.045199  |
| C | 0.446879  | 0.170687  | 0.000437  |
| C | 0.840480  | -1.027297 | -0.613669 |
| C | 1.437873  | 1.029867  | 0.488900  |
| C | 2.182805  | -1.348266 | -0.737292 |
| H | 0.098537  | -1.698504 | -1.033318 |
| C | 2.785342  | 0.713543  | 0.388296  |
| H | 1.143859  | 1.956961  | 0.968979  |
| C | 3.145337  | -0.481378 | -0.231566 |
| H | 2.500519  | -2.261318 | -1.228530 |
| H | 3.524773  | 1.393971  | 0.790831  |
| O | 4.448531  | -0.916134 | -0.402258 |
| C | 5.479798  | -0.137641 | -0.007543 |
| F | 5.478874  | 1.050705  | -0.615391 |
| F | 5.470759  | 0.084744  | 1.309601  |

F 6.598041 -0.770552 -0.318658

**Z-group substituent = *p*-bis-*m*-CF<sub>3</sub>**

adduct

0 2

|   |           |           |           |
|---|-----------|-----------|-----------|
| C | 4.505661  | 0.245367  | -0.055705 |
| C | 2.862598  | -1.288349 | -0.665485 |
| C | 3.880896  | -2.048608 | -1.511115 |
| C | 5.521496  | -0.508466 | -0.891841 |
| H | 4.028862  | 1.033996  | -0.655296 |
| H | 4.962980  | 0.696059  | 0.827844  |
| H | 4.330959  | -2.851319 | -0.904684 |
| H | 3.402708  | -2.486932 | -2.389920 |
| H | 6.041287  | -1.248015 | -0.263889 |
| H | 6.258237  | 0.172868  | -1.324710 |
| H | 2.344062  | -0.546426 | -1.289837 |
| O | 3.513162  | -0.663014 | 0.418393  |
| O | 4.873978  | -1.157946 | -1.973564 |
| S | 1.617240  | -2.457579 | -0.016155 |
| C | 0.093084  | -1.655334 | -0.298481 |
| S | -1.220066 | -2.729741 | -0.723228 |
| C | -2.303615 | -2.696079 | 0.792873  |
| C | -2.976112 | -1.334843 | 0.955306  |
| O | -2.826123 | -0.618193 | 1.914678  |
| C | -1.484221 | -3.012008 | 2.035487  |
| H | -0.983131 | -3.976895 | 1.918652  |
| H | -0.735049 | -2.239305 | 2.226596  |
| H | -2.143076 | -3.058140 | 2.908288  |
| C | -3.368783 | -3.766076 | 0.531662  |
| H | -4.086831 | -3.772993 | 1.358716  |
| H | -3.914503 | -3.575482 | -0.395224 |
| H | -2.901090 | -4.753107 | 0.475106  |
| O | -3.792243 | -1.042876 | -0.065321 |
| C | -4.514220 | 0.184342  | 0.069775  |
| H | -3.837636 | 1.009380  | 0.297560  |
| H | -5.013844 | 0.344998  | -0.884101 |
| H | -5.248912 | 0.097834  | 0.874599  |
| C | -0.092001 | -0.226866 | -0.159037 |
| C | 0.745957  | 0.544139  | 0.667149  |
| C | -1.111719 | 0.441945  | -0.875581 |
| C | 0.584954  | 1.922283  | 0.747883  |
| H | 1.528330  | 0.064062  | 1.246411  |
| C | -1.252561 | 1.813633  | -0.773105 |
| H | -1.771870 | -0.125043 | -1.523872 |
| C | -0.407479 | 2.579098  | 0.034933  |
| H | -0.526393 | 3.655370  | 0.101243  |
| C | 1.540939  | 2.682621  | 1.622544  |
| C | -2.317849 | 2.530490  | -1.552660 |
| F | -3.059893 | 1.695009  | -2.291984 |
| F | -1.792168 | 3.443534  | -2.382398 |
| F | -3.157137 | 3.193268  | -0.737561 |
| F | 1.255314  | 3.989337  | 1.672854  |
| F | 1.539701  | 2.218303  | 2.879094  |

F 2.805053 2.568184 1.173943

fragment A

0 1

|   |           |           |           |
|---|-----------|-----------|-----------|
| S | 1.655313  | -1.882411 | 0.696538  |
| C | 1.035736  | -0.596801 | -0.107946 |
| S | 1.917409  | 0.539706  | -1.089648 |
| C | 3.689270  | 0.058014  | -1.008653 |
| C | 4.194064  | -0.160249 | 0.419832  |
| O | 5.090052  | -0.920731 | 0.686182  |
| C | 4.442287  | 1.284353  | -1.556229 |
| H | 4.130630  | 1.500894  | -2.582481 |
| H | 4.272245  | 2.170182  | -0.938712 |
| H | 5.513475  | 1.060345  | -1.565509 |
| C | 3.964586  | -1.166721 | -1.874921 |
| H | 5.028670  | -1.410340 | -1.819293 |
| H | 3.399015  | -2.036051 | -1.533759 |
| H | 3.702486  | -0.951532 | -2.914174 |
| O | 3.629435  | 0.671026  | 1.298946  |
| C | 4.086659  | 0.519227  | 2.645018  |
| H | 3.516690  | 1.236287  | 3.234022  |
| H | 3.896221  | -0.498674 | 2.993698  |
| H | 5.155786  | 0.731811  | 2.712286  |
| C | -0.421399 | -0.274502 | -0.071239 |
| C | -1.355455 | -1.317115 | -0.088808 |
| C | -0.875738 | 1.044724  | -0.002077 |
| C | -2.712486 | -1.033998 | -0.050836 |
| H | -1.010282 | -2.344292 | -0.143753 |
| C | -2.241885 | 1.308706  | 0.050260  |
| H | -0.170811 | 1.869589  | 0.043564  |
| C | -3.171353 | 0.279334  | 0.021135  |
| H | -4.234519 | 0.491892  | 0.054187  |
| C | -3.707835 | -2.161328 | -0.031970 |
| C | -2.693620 | 2.742050  | 0.094131  |
| F | -1.954603 | 3.460954  | 0.950854  |
| F | -3.974016 | 2.852956  | 0.467446  |
| F | -2.575720 | 3.328897  | -1.106400 |
| F | -4.857554 | -1.810523 | -0.625168 |
| F | -4.010790 | -2.528491 | 1.221690  |
| F | -3.240209 | -3.247498 | -0.659257 |

fragment B

0 1

|   |          |           |           |
|---|----------|-----------|-----------|
| C | 5.279437 | -0.305208 | -1.246212 |
| C | 3.649861 | -0.209594 | 0.397569  |
| C | 4.644754 | 0.407785  | 1.377460  |
| C | 6.284508 | 0.293221  | -0.279803 |
| H | 5.308472 | -1.403371 | -1.194625 |
| H | 5.473952 | 0.010684  | -2.273754 |
| H | 4.593759 | 1.506421  | 1.315757  |
| H | 4.435099 | 0.091769  | 2.402533  |
| H | 6.301913 | 1.387520  | -0.395599 |
| H | 7.287907 | -0.101021 | -0.459226 |
| H | 3.649671 | -1.303387 | 0.506820  |

|   |           |           |           |
|---|-----------|-----------|-----------|
| O | 3.971070  | 0.156530  | -0.920065 |
| O | 5.941375  | -0.047065 | 1.054764  |
| S | 1.981488  | 0.390061  | 0.767732  |
| C | 0.964306  | -0.737456 | -0.117173 |
| S | 1.468732  | -2.081775 | -0.894750 |
| C | -0.470786 | -0.337391 | -0.066415 |
| C | -0.855773 | 1.002934  | -0.155983 |
| C | -1.455891 | -1.323771 | 0.061106  |
| C | -2.205441 | 1.342380  | -0.121794 |
| H | -0.112062 | 1.782873  | -0.287525 |
| C | -2.794358 | -0.964717 | 0.110220  |
| H | -1.163776 | -2.366078 | 0.133924  |
| C | -3.184789 | 0.369121  | 0.017564  |
| H | -4.234722 | 0.640407  | 0.053027  |
| C | -3.849650 | -2.031049 | 0.213336  |
| C | -2.589513 | 2.794779  | -0.185396 |
| F | -4.916835 | -1.598214 | 0.899053  |
| F | -4.288602 | -2.407700 | -0.996415 |
| F | -3.388605 | -3.128363 | 0.825879  |
| F | -1.805812 | 3.472592  | -1.034742 |
| F | -2.469208 | 3.386355  | 1.012637  |
| F | -3.857970 | 2.957518  | -0.581245 |

## 5. References

1. M. L. Allegranza, N. D. A. Watuthanthrige, Y. Wang, G. A. Garcia, H. Ren and D. Konkolewicz, *Polym. Chem.*, 2020, **11**, 6129-6133.
2. M. Benaglia, E. Rizzardo, A. Alberti and M. Guerra, *Macromolecules*, 2005, **38**, 3129-3140.
3. Y. Chong, J. Krstina, T. P. Le, G. Moad, A. Postma, E. Rizzardo and S. H. Thang, *Macromolecules*, 2003, **36**, 2256-2272.
4. C. Hansch, A. Leo and R. Taft, *Chem. Rev.*, 1991, **91**, 165-195.
5. P. Ertl, *Chemistry-Methods*, 2022, **2**, e202200041.
6. A. V. Marenich, C. J. Cramer and D. G. Truhlar, *J. Phys. Chem. B*, 2009, **113**, 6378-6396.
7. Y. Zhao and D. G. Truhlar, *Theor. Chem. Acc.*, 2008, **120**, 215-241.
8. W. J. Hehre, R. Ditchfield and J. A. Pople, *J. Chem. Phys.*, 1972, **56**, 2257-2261.
9. P. C. Hariharan and J. A. Pople, *Theoretica chimica acta*, 1973, **28**, 213-222.
10. M. M. Francl, W. J. Pietro, W. J. Hehre, J. S. Binkley, M. S. Gordon, D. J. DeFrees and J. A. Pople, *J. Chem. Phys.*, 1982, **77**, 3654-3665.
11. M. S. Gordon, J. S. Binkley, J. A. Pople, W. J. Pietro and W. J. Hehre, *J. Am. Chem. Soc.*, 1982, **104**, 2797-2803.
12. M. L. Coote, E. H. Krenske and E. I. Izgorodina, *Macromol. Rapid Commun.*, 2006, **27**, 473-497.
13. J.-D. Chai and M. Head-Gordon, *Physical Chemistry Chemical Physics*, 2008, **10**, 6615-6620.
14. R. A. Kendall, T. H. Dunning, Jr. and R. J. Harrison, *J. Chem. Phys.*, 1992, **96**, 6796-6806.
15. D. E. Woon and T. H. Dunning, Jr., *J. Chem. Phys.*, 1993, **98**, 1358-1371.



16. R. F. Ribeiro, A. V. Marenich, C. J. Cramer and D. G. Truhlar, *J. Phys. Chem. B*, 2011, **115**, 14556-14562.
17. J. Ho, A. Klamt and M. L. Coote, *J. Phys. Chem. A*, 2010, **114**, 13442-13444.
18. M. Frisch, G. Trucks, H. Schlegel, G. Scuseria, M. Robb, J. Cheeseman, G. Scalmani, V. Barone, G. Petersson and H. Nakatsuji, *Gaussian Inc. Wallingford CT*, 2016, **1**, 572.
19. C. Y. Legault, CYLview20, <http://www.cylview.org>
20. S. Perrier, *Macromolecules*, 2017, **50**, 7433-7447.
